# Supplementary material
Source: MDPI journal article supplement (https://www.mdpi.com/1424-2818/13/9/430)
Supplement: s1 [file s1]

Supplementary Table 3. Avian species sampled for lice in south Texas. TCWC ID is the voucher number of the avian specimen.

| TCWC ID | ORDER            | Family        | Genus                | Species               | SEX | LOCALITY                | Latitude  | Longitude  |
|---------|------------------|---------------|----------------------|-----------------------|-----|-------------------------|-----------|------------|
| 21709   | Passeriformes    | Passerellidae | <i>Arremonops</i>    | <i>rufivirgatus</i>   | M   | El Sauz Ranch           | 26.515772 | -97.506965 |
| 22729   | Falconiformes    | Falconidae    | <i>Falco</i>         | <i>sparverius</i>     | M   | San Antonio Viejo Ranch | 26.597561 | -98.840954 |
| 22728   | Passeriformes    | Hirundinidae  | <i>Progne</i>        | <i>subis</i>          | M   | El Sauz Ranch           | 26.594806 | -97.470966 |
| 22727   | Charadriiformes  | Scolopacidae  | <i>Limnodromus</i>   | <i>griseus</i>        | F   | El Sauz Ranch           | 26.53256  | -97.46609  |
| 22726   | Charadriiformes  | Charadriidae  | <i>Charadrius</i>    | <i>wilsonia</i>       | M   | El Sauz Ranch           | 26.55714  | -97.44864  |
| 22725   | Passeriformes    | Hirundinidae  | <i>Progne</i>        | <i>subis</i>          | U   | El Sauz Ranch           | 26.594806 | -97.470966 |
| 22724   | Passeriformes    | Tyrannidae    | <i>Tyrannus</i>      | <i>forficatus</i>     | M   | El Sauz Ranch           | 26.606059 | -97.479743 |
| 22723   | Charadriiformes  | Scolopacidae  | <i>Calidris</i>      | <i>minutilla</i>      | U   | El Sauz Ranch           | 26.606078 | -97.479741 |
| 21712   | Passeriformes    | Tyrannidae    | <i>Pyrocephalus</i>  | <i>rubinus</i>        | M   | San Antonio Viejo Ranch | 26.968096 | -98.692504 |
| 21697   | Passeriformes    | Corvidae      | <i>Corvus</i>        | <i>cryptoleucus</i>   | F   | San Antonio Viejo Ranch | 26.95062  | -98.74703  |
| 21710   | Passeriformes    | Passerellidae | <i>Passerculus</i>   | <i>sandwichensis</i>  | U   | El Sauz Ranch           | 26.61338  | -97.4446   |
| 22732   | Falconiformes    | Falconidae    | <i>Caracara</i>      | <i>cheriway</i>       | U   | El Sauz Ranch           | 26.60871  | -97.51251  |
| 21708   | Passeriformes    | Hirundinidae  | <i>Petrochelidon</i> | <i>fulva</i>          | U   | El Sauz Ranch           | 26.54161  | -97.44936  |
| 21707   | Columbiformes    | Columbidae    | <i>Zenaida</i>       | <i>macroura</i>       | F   | El Sauz Ranch           | 26.600565 | -97.501881 |
| 21706   | Passeriformes    | Icteridae     | <i>Icterus</i>       | <i>cucullatus</i>     | M   | El Sauz Ranch           | 26.59475  | -97.47102  |
| 21704   | Passeriformes    | Icteridae     | <i>Molothrus</i>     | <i>ater</i>           | F   | San Antonio Viejo Ranch | 26.949285 | -98.698377 |
| 21702   | Charadriiformes  | Scolopacidae  | <i>Calidris</i>      | <i>melanotos</i>      | M   | San Antonio Viejo Ranch | 26.968096 | -98.692504 |
| 21701   | Columbiformes    | Columbidae    | <i>Columbina</i>     | <i>passerina</i>      | U   | San Antonio Viejo Ranch | 26.75979  | -98.777    |
| 21700   | Passeriformes    | Cardinalidae  | <i>Passerina</i>     | <i>cyanea</i>         | M   | El Sauz Ranch           | 26.60871  | -97.51251  |
| 21699   | Passeriformes    | Cardinalidae  | <i>Cardinalis</i>    | <i>cardinalis</i>     | M   | El Sauz Ranch           | 26.60871  | -97.51251  |
| 21698   | Passeriformes    | Cardinalidae  | <i>Piranga</i>       | <i>rubra</i>          | M   | El Sauz Ranch           | 26.60871  | -97.51251  |
| 21711   | Caprimulgiformes | Caprimulgidae | <i>Chordeiles</i>    | <i>acutipennis</i>    | F   | San Antonio Viejo Ranch | 26.956771 | -98.83257  |
| 22741   | Passeriformes    | Paridae       | <i>Baeolophus</i>    | <i>atricristatus</i>  | U   | El Sauz Ranch           | 26.59238  | -97.53529  |
| 22750   | Passeriformes    | Passerellidae | <i>Passerculus</i>   | <i>sandwichensis</i>  | U   | San Antonio Viejo Ranch | 27.001747 | -98.811226 |
| 22748   | Pelicaniformes   | Ardeidae      | <i>Botaurus</i>      | <i>lentiginosus</i>   | F   | San Antonio Viejo Ranch | 26.94376  | -98.78631  |
| 22747   | Passeriformes    | Tyrannidae    | <i>Tyrannus</i>      | <i>tyrannus</i>       | U   | El Sauz Ranch           | 26.58644  | -97.53526  |
| 22746   | Columbiformes    | Columbidae    | <i>Zenaida</i>       | <i>macroura</i>       | M   | San Antonio Viejo Ranch | 26.838232 | -98.823387 |
| 22745   | Accipitriformes  | Accipitridae  | <i>Parabuteo</i>     | <i>unicinctus</i>     | F   | El Sauz Ranch           | 26.60272  | -97.52585  |
| 22744   | Caprimulgiformes | Trochilidae   | <i>Amazilia</i>      | <i>yucatanensis</i>   | U   | El Sauz Ranch           | 26.59238  | -97.53529  |
| 22730   | Passeriformes    | Passerellidae | <i>Passerculus</i>   | <i>sandwichensis</i>  | F   | El Sauz Ranch           | 26.61258  | -97.47411  |
| 22742   | Anseriformes     | Anatidae      | <i>Dendrocygna</i>   | <i>autumnalis</i>     | M   | El Sauz Ranch           | 26.53256  | -97.46609  |
| 22731   | Passeriformes    | Icteridae     | <i>Sturnella</i>     | <i>magna</i>          | F   | El Sauz Ranch           | 26.61218  | -97.44562  |
| 22740   | Passeriformes    | Parulidae     | <i>Parkesia</i>      | <i>noveboracensis</i> | U   | El Sauz Ranch           | 26.60871  | -97.51251  |
| 22739   | Columbiformes    | Columbidae    | <i>Leptotila</i>     | <i>verreauxi</i>      | F   | El Sauz Ranch           | 26.600745 | -97.502169 |
| 22738   | Passeriformes    | Icteridae     | <i>Agelaius</i>      | <i>phoeniceus</i>     | M   | El Sauz Ranch           | 26.51376  | -97.48492  |
| 22737   | Charadriiformes  | Scolopacidae  | <i>Bartramia</i>     | <i>longicauda</i>     | U   | El Sauz Ranch           | 26.53326  | -97.47076  |
| 22736   | Passeriformes    | Sturnidae     | <i>Sturnus</i>       | <i>vulgaris</i>       | U   | El Sauz Ranch           | 26.59018  | -97.45901  |
| 22735   | Pelicaniformes   | Ardeidae      | <i>Bubulcus</i>      | <i>ibis</i>           | F   | El Sauz Ranch           | 26.5591   | -97.53487  |
| 22734   | Columbiformes    | Columbidae    | <i>Leptotila</i>     | <i>verreauxi</i>      | F   | El Sauz Ranch           | 26.60871  | -97.51251  |
| 22733   | Piciformes       | Picidae       | <i>Melanerpes</i>    | <i>aurifrons</i>      | M   | San Antonio Viejo Ranch | 26.828873 | -98.735376 |
| 21703   | Passeriformes    | Icteridae     | <i>Molothrus</i>     | <i>ater</i>           | M   | San Antonio Viejo Ranch | 26.949285 | -98.698377 |
| 22743   | Passeriformes    | Paridae       | <i>Baeolophus</i>    | <i>atricristatus</i>  | M   | El Sauz Ranch           | 26.59238  | -97.53529  |
| 21666   | Passeriformes    | Passerellidae | <i>Chondestes</i>    | <i>grammacus</i>      | U   | El Sauz Ranch           | 26.53256  | -97.46609  |
| 21676   | Passeriformes    | Icteridae     | <i>Icterus</i>       | <i>cucullatus</i>     | M   | San Antonio Viejo Ranch | 26.74073  | -98.79218  |
| 21675   | Charadriiformes  | Scolopacidae  | <i>Arenaria</i>      | <i>interprex</i>      | F   | El Sauz Ranch           | 26.60732  | -97.44481  |
| 21674   | Passeriformes    | Hirundinidae  | <i>Petrochelidon</i> | <i>fulva</i>          | M   | El Sauz Ranch           | 26.52432  | -97.5027   |
| 21673   | Passeriformes    | Hirundinidae  | <i>Petrochelidon</i> | <i>fulva</i>          | U   | El Sauz Ranch           | 26.52432  | -97.5027   |
| 21672   | Passeriformes    | Parulidae     | <i>Setophaga</i>     | <i>magnolia</i>       | M   | El Sauz Ranch           | 26.61352  | -97.45987  |
| 21671   | Charadriiformes  | Laridae       | <i>Leucophaeus</i>   | <i>atricilla</i>      | U   | El Sauz Ranch           | 26.61218  | -97.44562  |
| 21670   | Columbiformes    | Columbidae    | <i>Zenaida</i>       | <i>macroura</i>       | F   | El Sauz Ranch           | 26.60871  | -97.51251  |
| 21696   | Cuculiformes     | Cuculidae     | <i>Geococcyx</i>     | <i>californianus</i>  | F   | El Sauz Ranch           | 26.5591   | -97.53487  |
| 21677   | Passeriformes    | Tyrannidae    | <i>Myiarchus</i>     | <i>tyrannulus</i>     | M   | El Sauz Ranch           | 26.59238  | -97.53529  |
| 21705   | Passeriformes    | Icteridae     | <i>Molothrus</i>     | <i>ater</i>           | M   | San Antonio Viejo Ranch | 26.949285 | -98.698377 |
| 21669   | Columbiformes    | Columbidae    | <i>Zenaida</i>       | <i>macroura</i>       | M   | El Sauz Ranch           | 26.60871  | -97.51251  |
| 21665   | Passeriformes    | Tyrannidae    | <i>Tyrannus</i>      | <i>tyrannus</i>       | U   | El Sauz Ranch           | 26.60418  | -97.53545  |
| 21664   | Passeriformes    | Icteridae     | <i>Agelaius</i>      | <i>phoeniceus</i>     | M   | San Antonio Viejo Ranch | 26.95582  | -98.8911   |
| 21663   | Passeriformes    | Laniidae      | <i>Lanius</i>        | <i>ludovicianus</i>   | M   | El Sauz Ranch           | 26.54939  | -97.44777  |
| 21662   | Piciformes       | Picidae       | <i>Picoides</i>      | <i>scalaris</i>       | F   | San Antonio Viejo Ranch | 26.75979  | -98.777    |
| 21661   | Cuculiformes     | Cuculidae     | <i>Crotophaga</i>    | <i>sulcirostris</i>   | U   | El Sauz Ranch           | 26.51376  | -97.48492  |
| 21660   | Passeriformes    | Mimidae       | <i>Mimus</i>         | <i>polyglottos</i>    | U   | El Sauz Ranch           | 26.51376  | -97.48492  |

|       |                  |                  |                       |                       |   |                         |           |            |
|-------|------------------|------------------|-----------------------|-----------------------|---|-------------------------|-----------|------------|
| 21659 | Passeriformes    | Cardinalidae     | <i>Piranga</i>        | <i>rubra</i>          | F | El Sauz Ranch           | 26.59238  | -97.53529  |
| 21658 | Passeriformes    | Icteridae        | <i>Molothrus</i>      | <i>ater</i>           | M | El Sauz Ranch           | 26.59477  | -97.48003  |
| 21668 | Charadriiformes  | Scolopacidae     | <i>Calidris</i>       | <i>minutilla</i>      | F | San Antonio Viejo Ranch | 26.71216  | -98.77537  |
| 21690 | Passeriformes    | Icteridae        | <i>Agelaius</i>       | <i>phoeniceus</i>     | F | El Sauz Ranch           | 26.51789  | -97.50285  |
| 21667 | Passeriformes    | Icteridae        | <i>Icterus</i>        | <i>cucullatus</i>     | M | El Sauz Ranch           | 26.59475  | -97.47102  |
| 21678 | Charadriiformes  | Recurvirostridae | <i>Himantopus</i>     | <i>himantopus</i>     | M | El Sauz Ranch           | 26.53252  | -97.4656   |
| 21694 | Passeriformes    | Tyrannidae       | <i>Pyrocephalus</i>   | <i>rubinus</i>        | U | San Antonio Viejo Ranch | 26.737759 | -98.774975 |
| 21693 | Charadriiformes  | Recurvirostridae | <i>Himantopus</i>     | <i>himantopus</i>     | F | El Sauz Ranch           | 26.53256  | -97.46609  |
| 21692 | Charadriiformes  | Scolopacidae     | <i>Tringa</i>         | <i>flavipes</i>       | F | El Sauz Ranch           | 26.53256  | -97.46609  |
| 21691 | Passeriformes    | Paridae          | <i>Baeolophus</i>     | <i>atricristatus</i>  | M | El Sauz Ranch           | 26.60871  | -97.51251  |
| 21695 | Passeriformes    | Tyrannidae       | <i>Sayornis</i>       | <i>phoebe</i>         | M | El Sauz Ranch           | 26.50623  | -97.51251  |
| 21689 | Passeriformes    | Mimidae          | <i>Toxostoma</i>      | <i>curvirostre</i>    | M | San Antonio Viejo Ranch | 26.78481  | -98.73243  |
| 21688 | Galliformes      | Odontophoridae   | <i>Colinus</i>        | <i>virginianus</i>    | M | El Sauz Ranch           | 26.59475  | -97.47102  |
| 21681 | Passeriformes    | Icteridae        | <i>Quiscalus</i>      | <i>mexicanus</i>      | M | El Sauz Ranch           | 26.59238  | -97.47102  |
| 21679 | Pelicaniformes   | Ardeidae         | <i>Egretta</i>        | <i>caerulea</i>       | U | El Sauz Ranch           | 26.50623  | -97.52443  |
| 21680 | Passeriformes    | Parulidae        | <i>Parkesia</i>       | <i>noveboracensis</i> | U | San Antonio Viejo Ranch | 26.7376   | -98.77489  |
| 21687 | Passeriformes    | Icteridae        | <i>Molothrus</i>      | <i>ater</i>           | U | El Sauz Ranch           | 26.59475  | -97.47102  |
| 21682 | Passeriformes    | Troglodytidae    | <i>Thryothorus</i>    | <i>ludovicianus</i>   | U | El Sauz Ranch           | 26.59238  | -97.53529  |
| 21683 | Cuculiformes     | Cuculidae        | <i>Geococcyx</i>      | <i>californianus</i>  | M | El Sauz Ranch           | 26.5591   | -97.53487  |
| 21684 | Passeriformes    | Hirundinidae     | <i>Progne</i>         | <i>subis</i>          | M | El Sauz Ranch           | 26.58769  | -97.45689  |
| 21685 | Passeriformes    | Laniidae         | <i>Lanius</i>         | <i>ludovicianus</i>   | M | El Sauz Ranch           | 26.58769  | -97.45689  |
| 21686 | Charadriiformes  | Scolopacidae     | <i>Numenius</i>       | <i>americanus</i>     | F | El Sauz Ranch           | 26.61338  | -97.4446   |
| 23926 | Passeriformes    | Parulidae        | <i>Parkesia</i>       | <i>motacilla</i>      | F | San Antonio Viejo Ranch | 26.915447 | -98.734892 |
| 23945 | Charadriiformes  | Scolopacidae     | <i>Tringa</i>         | <i>flavipes</i>       | M | El Sauz Ranch           | 26.532949 | -97.466631 |
| 23936 | Charadriiformes  | Laridae          | <i>Sterna</i>         | <i>forsteri</i>       | F | El Sauz Ranch           |           |            |
| 23931 | Passeriformes    | Parulidae        | <i>Leiothlypis</i>    | <i>celata</i>         | F | San Antonio Viejo Ranch | 26.9627   | -98.851687 |
| 23930 | Columbiformes    | Columbidae       | <i>Streptopelia</i>   | <i>decaocto</i>       | F | San Antonio Viejo Ranch | 26.9627   | -98.851687 |
| 23946 | Passeriformes    | Icteridae        | <i>Icterus</i>        | <i>graduacauda</i>    | M | El Sauz Ranch           | 26.592159 | -97.475611 |
| 23915 | Charadriiformes  | Scolopacidae     | <i>Steganopus</i>     | <i>tricolor</i>       | F | El Sauz Ranch           | 26.532949 | -97.466631 |
| 22898 | Caprimulgiformes | Caprimulgidae    | <i>Phalaenoptilus</i> | <i>nuttallii</i>      | F | San Antonio Viejo Ranch | 27.177701 | -98.862791 |
| 22897 | Charadriiformes  | Scolopacidae     | <i>Arenaria</i>       | <i>interpres</i>      | M | El Sauz Ranch           | 26.612897 | -97.445092 |
| 18183 | Passeriformes    | Tyrannidae       | <i>Tyrannus</i>       | <i>couchii</i>        | M | San Antonio Viejo Ranch | 26.915415 | -98.734836 |
| 18184 | Cuculiformes     | Cuculidae        | <i>Crotophaga</i>     | <i>sulcirostris</i>   | M | San Antonio Viejo Ranch | 26.915415 | -98.734836 |
| 18185 | Passeriformes    | Cardinalidae     | <i>Cardinalis</i>     | <i>sinuatus</i>       | M | San Antonio Viejo Ranch | 26.915415 | -98.734836 |
| 18186 | Passeriformes    | Vireonidae       | <i>Vireo</i>          | <i>bellii</i>         | F | San Antonio Viejo Ranch | 26.915415 | -98.734836 |
| 18189 | Galliformes      | Odontophoridae   | <i>Callipepla</i>     | <i>squamata</i>       | M | San Antonio Viejo Ranch | 26.95901  | -98.81767  |
| 18187 | Cuculiformes     | Cuculidae        | <i>Coccyzus</i>       | <i>americanus</i>     | F | San Antonio Viejo Ranch | 26.915415 | -98.734836 |
| 18137 | Passeriformes    | Icteridae        | <i>Icterus</i>        | <i>cucullatus</i>     | M | San Antonio Viejo Ranch | 26.95582  | -98.89110  |
| 18141 | Passeriformes    | Cardinalidae     | <i>Cardinalis</i>     | <i>sinuatus</i>       | F | San Antonio Viejo Ranch | 26.73616  | -98.72861  |
| 18140 | Passeriformes    | Icteridae        | <i>Icterus</i>        | <i>graduacauda</i>    | M | San Antonio Viejo Ranch | 26.75990  | -98.77705  |
| 18139 | Passeriformes    | Cardinalidae     | <i>Passerina</i>      | <i>versicolor</i>     | M | San Antonio Viejo Ranch | 26.75990  | -98.77705  |
| 18138 | Passeriformes    | Remizidae        | <i>Auriparus</i>      | <i>flaviceps</i>      | M | San Antonio Viejo Ranch | 26.95582  | -98.89110  |
| 18136 | Passeriformes    | Corvidae         | <i>Cyanocorax</i>     | <i>yncas</i>          | M | San Antonio Viejo Ranch | 26.75990  | -98.77705  |
| 18135 | Passeriformes    | Mimidae          | <i>Toxostoma</i>      | <i>longirostre</i>    | M | San Antonio Viejo Ranch | 26.79981  | -98.75737  |
| 23621 | Passeriformes    | Cardinalidae     | <i>Cardinalis</i>     | <i>cardinalis</i>     | F | El Sauz Ranch           | 26.59933  | -97.53178  |
| 23636 | Passeriformes    | Parulidae        | <i>Parkesia</i>       | <i>motacilla</i>      | F | El Sauz Ranch           | 26.59933  | -97.53178  |
| 23635 | Passeriformes    | Cardinalidae     | <i>Cardinalis</i>     | <i>cardinalis</i>     | F | El Sauz Ranch           | 26.59933  | -97.53178  |
| 23634 | Passeriformes    | Passerellidae    | <i>Melospiza</i>      | <i>lincolnii</i>      | M | El Sauz Ranch           | 26.59933  | -97.53178  |
| 23633 | Passeriformes    | Passerellidae    | <i>Melospiza</i>      | <i>lincolnii</i>      | F | El Sauz Ranch           | 26.59933  | -97.53178  |
| 23632 | Passeriformes    | Parulidae        | <i>Geothlypis</i>     | <i>trichas</i>        | M | El Sauz Ranch           | 26.59933  | -97.53178  |
| 23631 | Passeriformes    | Troglodytidae    | <i>Thryomanes</i>     | <i>bewickii</i>       | M | El Sauz Ranch           | 26.59933  | -97.53178  |
| 23630 | Passeriformes    | Cardinalidae     | <i>Passerina</i>      | <i>cyanea</i>         | M | El Sauz Ranch           | 26.59933  | -97.53178  |
| 23629 | Passeriformes    | Fringillidae     | <i>Spinus</i>         | <i>psaltria</i>       | M | El Sauz Ranch           | 26.59933  | -97.53178  |
| 23620 | Passeriformes    | Tyrannidae       | <i>Myiarchus</i>      | <i>sp.</i>            | M | El Sauz Ranch           | 26.59933  | -97.53178  |
| 23627 | Passeriformes    | Passerellidae    | <i>Melospiza</i>      | <i>lincolnii</i>      | M | El Sauz Ranch           | 26.59933  | -97.53178  |
| 23622 | Passeriformes    | Passerellidae    | <i>Melospiza</i>      | <i>lincolnii</i>      | M | El Sauz Ranch           | 26.59933  | -97.53178  |
| 23618 | Passeriformes    | Passerellidae    | <i>Melospiza</i>      | <i>lincolnii</i>      | F | El Sauz Ranch           | 26.59933  | -97.53178  |
| 23623 | Passeriformes    | Parulidae        | <i>Leiothlypis</i>    | <i>celata</i>         | F | El Sauz Ranch           | 26.59933  | -97.53178  |
| 23639 | Passeriformes    | Cardinalidae     | <i>Cardinalis</i>     | <i>cardinalis</i>     | F | El Sauz Ranch           | 26.59933  | -97.53178  |
| 23624 | Passeriformes    | Troglodytidae    | <i>Troglodytes</i>    | <i>aedon</i>          | M | El Sauz Ranch           | 26.59933  | -97.53178  |
| 23625 | Passeriformes    | Parulidae        | <i>Parkesia</i>       | <i>motacilla</i>      | M | El Sauz Ranch           | 26.59933  | -97.53178  |
| 23626 | Passeriformes    | Parulidae        | <i>Parkesia</i>       | <i>motacilla</i>      | M | El Sauz Ranch           | 26.59933  | -97.53178  |
| 23628 | Passeriformes    | Cardinalidae     | <i>Passerina</i>      | <i>cyanea</i>         | M | El Sauz Ranch           | 26.59933  | -97.53178  |

|       |                 |               |                    |                      |   |                         |           |            |
|-------|-----------------|---------------|--------------------|----------------------|---|-------------------------|-----------|------------|
| 23619 | Passeriformes   | Corvidae      | <i>Cyanocorax</i>  | <i>yncas</i>         | M | El Sauz Ranch           | 26.59933  | -97.53178  |
| 23651 | Passeriformes   | Hirundinidae  | <i>Riparia</i>     | <i>riparia</i>       | M | El Sauz Ranch           | 26.59933  | -97.53178  |
| 23664 | Passeriformes   | Vireonidae    | <i>Vireo</i>       | <i>olivaceus</i>     | F | El Sauz Ranch           | 26.610261 | -97.459483 |
| 23663 | Passeriformes   | Corvidae      | <i>Cyanocorax</i>  | <i>yncas</i>         | F | El Sauz Ranch           | 26.613172 | -97.506217 |
| 23662 | Passeriformes   | Tyrannidae    | <i>Myiarchus</i>   | <i>sp.</i>           | M | El Sauz Ranch           | 26.60893  | -97.51284  |
| 23661 | Passeriformes   | Mimidae       | <i>Toxostoma</i>   | <i>longirostre</i>   | F | El Sauz Ranch           | 26.59933  | -97.53178  |
| 23660 | Passeriformes   | Icteridae     | <i>Icterus</i>     | <i>cucullatus</i>    | F | El Sauz Ranch           | 26.60893  | -97.51284  |
| 23659 | Passeriformes   | Icteridae     | <i>Icterus</i>     | <i>cucullatus</i>    | M | El Sauz Ranch           | 26.60893  | -97.51284  |
| 23658 | Passeriformes   | Icteridae     | <i>Icterus</i>     | <i>cucullatus</i>    | M | El Sauz Ranch           | 26.60893  | -97.51284  |
| 23657 | Passeriformes   | Icteridae     | <i>Icterus</i>     | <i>cucullatus</i>    | M | El Sauz Ranch           | 26.610261 | -97.459483 |
| 23656 | Passeriformes   | Paridae       | <i>Baeolophus</i>  | <i>atricristatus</i> | F | El Sauz Ranch           | 26.60893  | -97.51284  |
| 23655 | Passeriformes   | Vireonidae    | <i>Vireo</i>       | <i>griseus</i>       | M | El Sauz Ranch           | 26.59933  | -97.53178  |
| 23654 | Passeriformes   | Cardinalidae  | <i>Passerina</i>   | <i>cyanea</i>        | M | El Sauz Ranch           | 26.59933  | -97.53178  |
| 23637 | Passeriformes   | Passerellidae | <i>Melospiza</i>   | <i>lincolni</i>      | M | El Sauz Ranch           | 26.59933  | -97.53178  |
| 23652 | Passeriformes   | Parulidae     | <i>Parkesia</i>    | <i>motacilla</i>     | F | El Sauz Ranch           | 26.59933  | -97.53178  |
| 23638 | Passeriformes   | Icteridae     | <i>Icteria</i>     | <i>virens</i>        | F | El Sauz Ranch           | 26.59933  | -97.53178  |
| 23650 | Passeriformes   | Troglodytidae | <i>Thryomanes</i>  | <i>bewickii</i>      | M | El Sauz Ranch           | 26.59933  | -97.53178  |
| 23649 | Passeriformes   | Parulidae     | <i>Parkesia</i>    | <i>motacilla</i>     | F | El Sauz Ranch           | 26.59933  | -97.53178  |
| 23648 | Passeriformes   | Icteridae     | <i>Icteria</i>     | <i>virens</i>        | M | El Sauz Ranch           | 26.59933  | -97.53178  |
| 23647 | Passeriformes   | Mimidae       | <i>Mimus</i>       | <i>polyglottos</i>   | M | El Sauz Ranch           | 26.59933  | -97.53178  |
| 23646 | Passeriformes   | Regulidae     | <i>Regulus</i>     | <i>calendula</i>     | F | El Sauz Ranch           | 26.59933  | -97.53178  |
| 23645 | Passeriformes   | Cardinalidae  | <i>Passerina</i>   | <i>cyanea</i>        | M | El Sauz Ranch           | 26.59933  | -97.53178  |
| 23644 | Passeriformes   | Cardinalidae  | <i>Passerina</i>   | <i>cyanea</i>        | M | El Sauz Ranch           | 26.59933  | -97.53178  |
| 23643 | Passeriformes   | Cardinalidae  | <i>Piranga</i>     | <i>rubra</i>         | M | El Sauz Ranch           | 26.59933  | -97.53178  |
| 23642 | Passeriformes   | Cardinalidae  | <i>Cardinalis</i>  | <i>cardinalis</i>    | F | El Sauz Ranch           | 26.59933  | -97.53178  |
| 23641 | Passeriformes   | Mimidae       | <i>Mimus</i>       | <i>polyglottos</i>   | F | El Sauz Ranch           | 26.59933  | -97.53178  |
| 23640 | Passeriformes   | Cardinalidae  | <i>Cardinalis</i>  | <i>cardinalis</i>    | F | El Sauz Ranch           | 26.59933  | -97.53178  |
| 23615 | Passeriformes   | Mimidae       | <i>Mimus</i>       | <i>polyglottos</i>   | F | El Sauz Ranch           | 26.59933  | -97.53178  |
| 23653 | Passeriformes   | Parulidae     | <i>Setophaga</i>   | <i>virens</i>        | M | El Sauz Ranch           | 26.59933  | -97.53178  |
| 23471 | Charadriiformes | Laridae       | <i>Thalasseus</i>  | <i>maximus</i>       | F | El Sauz Ranch           | 26.613433 | -97.4451   |
| 23718 | Passeriformes   | Icteridae     | <i>Molothrus</i>   | <i>aeneus</i>        | F | El Sauz Ranch           | 26.59933  | -97.53178  |
| 18011 | Passeriformes   | Icteridae     | <i>Molothrus</i>   | <i>aeneus</i>        | M | San Antonio Viejo Ranch | 26.78484  | -98.73244  |
| 18010 | Passeriformes   | Icteridae     | <i>Molothrus</i>   | <i>aeneus</i>        | F | San Antonio Viejo Ranch | 26.78484  | -98.73244  |
| 23607 | Passeriformes   | Tyrannidae    | <i>Contopus</i>    | <i>cooperi</i>       | U | El Sauz Ranch           |           |            |
| 23606 | Passeriformes   | Turdidae      | <i>Sialia</i>      | <i>sialis</i>        | F | El Sauz Ranch           | 26.613175 | -97.490856 |
| 23605 | Passeriformes   | Fringillidae  | <i>Spinus</i>      | <i>psaltria</i>      | M | El Sauz Ranch           | 26.60893  | -97.51284  |
| 23604 | Passeriformes   | Cardinalidae  | <i>Piranga</i>     | <i>rubra</i>         | F | El Sauz Ranch           | 26.59933  | -97.53178  |
| 23717 | Passeriformes   | Passerellidae | <i>Chondestes</i>  | <i>grammacus</i>     | F | El Sauz Ranch           | 26.60893  | -97.51284  |
| 23603 | Cuculiformes    | Cuculidae     | <i>Crotophaga</i>  | <i>sulcirostris</i>  | M | El Sauz Ranch           | 26.59933  | -97.53178  |
| 18009 | Passeriformes   | Troglodytidae | <i>Thryomanes</i>  | <i>bewickii</i>      | M | San Antonio Viejo Ranch | 26.74447  | -98.71878  |
| 23716 | Passeriformes   | Icteridae     | <i>Molothrus</i>   | <i>aeneus</i>        | M | El Sauz Ranch           | 26.59933  | -97.53178  |
| 23617 | Passeriformes   | Cardinalidae  | <i>Passerina</i>   | <i>cyanea</i>        | F | El Sauz Ranch           | 26.59933  | -97.53178  |
| 18008 | Passeriformes   | Tyrannidae    | <i>Myiarchus</i>   | <i>cinerascens</i>   | F | San Antonio Viejo Ranch | 26.96257  | -98.85157  |
| 18013 | Passeriformes   | Cardinalidae  | <i>Cardinalis</i>  | <i>cardinalis</i>    | F | San Antonio Viejo Ranch | 26.95606  | -98.78828  |
| 18006 | Passeriformes   | Passerellidae | <i>Arremonops</i>  | <i>rufivirgatus</i>  | F | San Antonio Viejo Ranch | 26.95606  | -98.78828  |
| 23597 | Passeriformes   | Parulidae     | <i>Cardellina</i>  | <i>pusilla</i>       | M | San Antonio Viejo Ranch | 26.7549   | -98.77705  |
| 23602 | Anseriformes    | Anatidae      | <i>Spatula</i>     | <i>clypeata</i>      | M | El Sauz Ranch           |           |            |
| 18004 | Passeriformes   | Parulidae     | <i>Setophaga</i>   | <i>petechia</i>      | F | San Antonio Viejo Ranch | 26.77173  | -98.71939  |
| 18003 | Passeriformes   | Corvidae      | <i>Cyanocorax</i>  | <i>yncas</i>         | M | San Antonio Viejo Ranch | 26.92635  | -98.88522  |
| 18002 | Passeriformes   | Corvidae      | <i>Cyanocorax</i>  | <i>yncas</i>         | M | San Antonio Viejo Ranch | 26.74447  | -98.71878  |
| 18001 | Passeriformes   | Cardinalidae  | <i>Cardinalis</i>  | <i>cardinalis</i>    | F | San Antonio Viejo Ranch | 26.95606  | -98.78828  |
| 18000 | Passeriformes   | Cardinalidae  | <i>Passerina</i>   | <i>ciris</i>         | M | San Antonio Viejo Ranch | 26.95606  | -98.78828  |
| 17999 | Passeriformes   | Cardinalidae  | <i>Passerina</i>   | <i>ciris</i>         | F | San Antonio Viejo Ranch | 26.95606  | -98.78828  |
| 17998 | Piciformes      | Picidae       | <i>Melanerpes</i>  | <i>aurifrons</i>     | M | San Antonio Viejo Ranch | 26.79738  | -98.78442  |
| 23715 | Passeriformes   | Icteridae     | <i>Molothrus</i>   | <i>ater</i>          | M | El Sauz Ranch           | 26.59933  | -97.53178  |
| 18024 | Cuculiformes    | Cuculidae     | <i>Geococcyx</i>   | <i>californianus</i> | F | San Antonio Viejo Ranch | 26.95606  | -98.78828  |
| 23616 | Passeriformes   | Turdidae      | <i>Sialia</i>      | <i>sialis</i>        | F | El Sauz Ranch           | 26.59933  | -97.53178  |
| 23670 | Passeriformes   | Parulidae     | <i>Vermivora</i>   | <i>chrysoptera</i>   | M | El Sauz Ranch           | 26.610261 | -97.459483 |
| 23614 | Charadriiformes | Scolopacidae  | <i>Calidris</i>    | <i>alba</i>          | M | El Sauz Ranch           | 26.613433 | -97.4451   |
| 23613 | Charadriiformes | Laridae       | <i>Sterna</i>      | <i>forsteri</i>      | F | El Sauz Ranch           | 26.613433 | -97.4451   |
| 23612 | Charadriiformes | Scolopacidae  | <i>Arenaria</i>    | <i>interpres</i>     | F | El Sauz Ranch           | 26.613433 | -97.4451   |
| 23720 | Passeriformes   | Parulidae     | <i>Helmitheros</i> | <i>vermivorum</i>    | F | El Sauz Ranch           | 26.59933  | -97.53178  |
| 23719 | Passeriformes   | Mimidae       | <i>Dumetella</i>   | <i>carolinensis</i>  | M | El Sauz Ranch           | 26.613528 | -97.459483 |

|       |                     |                |                        |                        |   |                         |           |            |
|-------|---------------------|----------------|------------------------|------------------------|---|-------------------------|-----------|------------|
| 23611 | Passeriformes       | Vireonidae     | <i>Vireo</i>           | <i>solitarius</i>      | F | El Sauz Ranch           | 26.59933  | -97.53178  |
| 18030 | Passeriformes       | Paridae        | <i>Baeolophus</i>      | <i>atricristatus</i>   | F | San Antonio Viejo Ranch | 26.90949  | -98.84032  |
| 18029 | Passeriformes       | Tyrannidae     | <i>Pyrocephalus</i>    | <i>rubinus</i>         | F | San Antonio Viejo Ranch | 26.90949  | -98.84032  |
| 23608 | Pelicaniformes      | Ardeidae       | <i>Egretta</i>         | <i>tricolor</i>        | M | El Sauz Ranch           | 26.51423  | -97.48663  |
| 18012 | Passeriformes       | Icteridae      | <i>Icterus</i>         | <i>bullockii</i>       | M | San Antonio Viejo Ranch | 26.78484  | -98.73244  |
| 18023 | Caprimulgiformes    | Caprimulgidae  | <i>Chordeiles</i>      | <i>acutipennis</i>     | F | San Antonio Viejo Ranch |           |            |
| 18022 | Passeriformes       | Cardinalidae   | <i>Cardinalis</i>      | <i>cardinalis</i>      | M | San Antonio Viejo Ranch | 26.74447  | -98.71878  |
| 23609 | Galliformes         | Odontophoridae | <i>Colinus</i>         | <i>virginianus</i>     | F | El Sauz Ranch           |           |            |
| 18021 | Passeriformes       | Cardinalidae   | <i>Cardinalis</i>      | <i>cardinalis</i>      | M | San Antonio Viejo Ranch | 26.90949  | -98.84032  |
| 18020 | Passeriformes       | Icteridae      | <i>Icterus</i>         | <i>bullockii</i>       | M | San Antonio Viejo Ranch | 26.83534  | -98.84689  |
| 18019 | Passeriformes       | Icteridae      | <i>Molothrus</i>       | <i>aeneus</i>          | M | San Antonio Viejo Ranch | 26.83534  | -98.84689  |
| 18018 | Passeriformes       | Passerellidae  | <i>Arremonops</i>      | <i>rufivirgatus</i>    | M | San Antonio Viejo Ranch | 26.92639  | -98.8862   |
| 18017 | Passeriformes       | Tyrannidae     | <i>Pyrocephalus</i>    | <i>rubinus</i>         | M | San Antonio Viejo Ranch |           |            |
| 18016 | Passeriformes       | Tyrannidae     | <i>Tyrannus</i>        | <i>forficatus</i>      | F | San Antonio Viejo Ranch | 26.94974  | -98.81325  |
| 18015 | Passeriformes       | Cardinalidae   | <i>Passerina</i>       | <i>ciris</i>           | F | San Antonio Viejo Ranch | 26.83047  | -98.68671  |
| 18014 | Passeriformes       | Cardinalidae   | <i>Cardinalis</i>      | <i>cardinalis</i>      | M | San Antonio Viejo Ranch | 26.74447  | -98.71878  |
| 23665 | Passeriformes       | Icteridae      | <i>Icteria</i>         | <i>virens</i>          | M | El Sauz Ranch           | 26.59933  | -97.53178  |
| 18025 | Cuculiformes        | Cuculidae      | <i>Geococcyx</i>       | <i>californianus</i>   | F | San Antonio Viejo Ranch | 26.96257  | -98.85157  |
| 18072 | Passeriformes       | Troglodytidae  | <i>Thryomanes</i>      | <i>bewickii</i>        | F | San Antonio Viejo Ranch | 26.7599   | -98.77705  |
| 18060 | Passeriformes       | Icteridae      | <i>Sturnella</i>       | <i>sp.</i>             | M | San Antonio Viejo Ranch | 26.71556  | -98.77561  |
| 18061 | Charadriiformes     | Scolopacidae   | <i>Tringa</i>          | <i>solitaria</i>       | F | San Antonio Viejo Ranch | 26.71556  | -98.77561  |
| 18062 | Passeriformes       | Icteridae      | <i>Quiscalus</i>       | <i>mexicanus</i>       | M | San Antonio Viejo Ranch | 26.73616  | -98.72861  |
| 18063 | Passeriformes       | Troglodytidae  | <i>Campylorhynchus</i> | <i>brunneicapillus</i> | F | San Antonio Viejo Ranch | 26.838232 | -98.823387 |
| 18064 | Charadriiformes     | Scolopacidae   | <i>Tringa</i>          | <i>solitaria</i>       | F | San Antonio Viejo Ranch | 26.71556  | -98.77561  |
| 18065 | Passeriformes       | Mimidae        | <i>Toxostoma</i>       | <i>curvirostre</i>     | F | San Antonio Viejo Ranch | 26.71556  | -98.77561  |
| 18066 | Passeriformes       | Tyrannidae     | <i>Myiarchus</i>       | <i>cinerascens</i>     | M | San Antonio Viejo Ranch | 26.7379   | -98.77509  |
| 18067 | Passeriformes       | Tyrannidae     | <i>Tyrannus</i>        | <i>couchii</i>         | F | San Antonio Viejo Ranch | 26.7379   | -98.77509  |
| 18068 | Passeriformes       | Corvidae       | <i>Cyanocorax</i>      | <i>yncas</i>           | M | San Antonio Viejo Ranch | 26.7379   | -98.77509  |
| 18069 | Passeriformes       | Cardinalidae   | <i>Cardinalis</i>      | <i>cardinalis</i>      | F | San Antonio Viejo Ranch | 26.7379   | -98.77509  |
| 23668 | Passeriformes       | Cardinalidae   | <i>Passerina</i>       | <i>ciris</i>           | M | El Sauz Ranch           | 26.610261 | -97.459483 |
| 18071 | Passeriformes       | Remizidae      | <i>Auriparus</i>       | <i>flaviceps</i>       | M | San Antonio Viejo Ranch | 26.7599   | -98.77705  |
| 18057 | Passeriformes       | Corvidae       | <i>Cyanocorax</i>      | <i>yncas</i>           | M | San Antonio Viejo Ranch | 26.7379   | -98.77509  |
| 18073 | Passeriformes       | Remizidae      | <i>Auriparus</i>       | <i>flaviceps</i>       | M | San Antonio Viejo Ranch | 26.7599   | -98.77705  |
| 18076 | Passeriformes       | Cardinalidae   | <i>Passerina</i>       | <i>versicolor</i>      | M | San Antonio Viejo Ranch | 26.7599   | -98.77705  |
| 18077 | Passeriformes       | Mimidae        | <i>Mimus</i>           | <i>polyglottos</i>     | F | San Antonio Viejo Ranch | 26.7599   | -98.77705  |
| 18078 | Piciformes          | Picidae        | <i>Picoides</i>        | <i>scalaris</i>        | M | San Antonio Viejo Ranch | 26.7599   | -98.77705  |
| 18079 | Passeriformes       | Icteridae      | <i>Icterus</i>         | <i>spurius</i>         | F | San Antonio Viejo Ranch | 26.7599   | -98.77705  |
| 18080 | Passeriformes       | Passerellidae  | <i>Chondestes</i>      | <i>grammacus</i>       | M | San Antonio Viejo Ranch | 26.95582  | -98.8911   |
| 18081 | Passeriformes       | Tyrannidae     | <i>Tyrannus</i>        | <i>forficatus</i>      | F | San Antonio Viejo Ranch | 26.95582  | -98.8911   |
| 18082 | Passeriformes       | Icteridae      | <i>Agelaius</i>        | <i>phoeniceus</i>      | M | San Antonio Viejo Ranch | 26.95582  | -98.8911   |
| 18083 | Charadriiformes     | Charadriidae   | <i>Charadrius</i>      | <i>vociferus</i>       | F | San Antonio Viejo Ranch | 26.95582  | -98.8911   |
| 18084 | Passeriformes       | Troglodytidae  | <i>Thryomanes</i>      | <i>bewickii</i>        | M | San Antonio Viejo Ranch | 26.79981  | -98.75737  |
| 18085 | Passeriformes       | Paridae        | <i>Baeolophus</i>      | <i>atricristatus</i>   | F | San Antonio Viejo Ranch | 26.79981  | -98.75737  |
| 18070 | Passeriformes       | Mimidae        | <i>Toxostoma</i>       | <i>longirostre</i>     | M | San Antonio Viejo Ranch | 26.7379   | -98.77509  |
| 18046 | Passeriformes       | Cardinalidae   | <i>Passerina</i>       | <i>versicolor</i>      | F | San Antonio Viejo Ranch | 26.7599   | -98.77705  |
| 18033 | Passeriformes       | Cardinalidae   | <i>Cardinalis</i>      | <i>sinuatus</i>        | M | San Antonio Viejo Ranch | 26.90949  | -98.48032  |
| 18034 | Passeriformes       | Icteridae      | <i>Agelaius</i>        | <i>phoeniceus</i>      | U | San Antonio Viejo Ranch | 26.74447  | -98.71878  |
| 18035 | Passeriformes       | Poliophtidae   | <i>Poliophtila</i>     | <i>caerulea</i>        | F | San Antonio Viejo Ranch | 26.74447  | -98.71878  |
| 18036 | Passeriformes       | Tyrannidae     | <i>Pyrocephalus</i>    | <i>rubinus</i>         | M | San Antonio Viejo Ranch | 26.75448  | -98.7169   |
| 18037 | Columbiformes       | Columbidae     | <i>Zenaida</i>         | <i>macroura</i>        | F | San Antonio Viejo Ranch | 26.83624  | -98.79912  |
| 18038 | Passeriformes       | Icteridae      | <i>Icterus</i>         | <i>bullockii</i>       | F | San Antonio Viejo Ranch | 26.74447  | -98.71878  |
| 18039 | Passeriformes       | Icteridae      | <i>Icterus</i>         | <i>gularis</i>         | M | San Antonio Viejo Ranch | 26.95606  | -98.78828  |
| 18040 | Passeriformes       | Passerellidae  | <i>Amphispiza</i>      | <i>bilineata</i>       | M | San Antonio Viejo Ranch | 26.71556  | -98.77561  |
| 18041 | Passeriformes       | Troglodytidae  | <i>Campylorhynchus</i> | <i>brunneicapillus</i> | M | San Antonio Viejo Ranch | 26.71556  | -98.77561  |
| 18042 | Passeriformes       | Icteridae      | <i>Icterus</i>         | <i>graduacauda</i>     | M | San Antonio Viejo Ranch | 26.7599   | -98.77705  |
| 18043 | Passeriformes       | Cardinalidae   | <i>Passerina</i>       | <i>ciris</i>           | F | San Antonio Viejo Ranch | 26.7599   | -98.77705  |
| 18059 | Passeriformes       | Tyrannidae     | <i>Tyrannus</i>        | <i>couchii</i>         | F | San Antonio Viejo Ranch | 26.7599   | -98.77705  |
| 18045 | Passeriformes       | Passerellidae  | <i>Amphispiza</i>      | <i>bilineata</i>       | M | San Antonio Viejo Ranch | 26.7599   | -98.77705  |
| 18058 | Passeriformes       | Cardinalidae   | <i>Passerina</i>       | <i>ciris</i>           | F | San Antonio Viejo Ranch | 26.7599   | -98.77705  |
| 18047 | Passeriformes       | Icteridae      | <i>Icterus</i>         | <i>graduacauda</i>     | F | San Antonio Viejo Ranch | 26.7379   | -98.77509  |
| 18048 | Passeriformes       | Tyrannidae     | <i>Pitangus</i>        | <i>sulphuratus</i>     | M | San Antonio Viejo Ranch | 26.7379   | -98.77509  |
| 18049 | Phoenicopteriformes | Podicipedidae  | <i>Tachybaptus</i>     | <i>dominicus</i>       | M | San Antonio Viejo Ranch | 26.95606  | -98.78828  |
| 18050 | Passeriformes       | Icteridae      | <i>Molothrus</i>       | <i>ater</i>            | M | San Antonio Viejo Ranch | 26.7379   | -98.77509  |

|       |                 |               |                      |                       |   |                         |           |            |
|-------|-----------------|---------------|----------------------|-----------------------|---|-------------------------|-----------|------------|
| 18051 | Passeriformes   | Icteridae     | <i>Molothrus</i>     | <i>ater</i>           | F | San Antonio Viejo Ranch | 26.7379   | -98.77509  |
| 18052 | Passeriformes   | Hirundinidae  | <i>Petrochelidon</i> | <i>pyrrhonota</i>     | M | San Antonio Viejo Ranch | 26.71556  | -98.77561  |
| 18053 | Passeriformes   | Cardinalidae  | <i>Passerina</i>     | <i>caerulea</i>       | M | San Antonio Viejo Ranch | 26.71556  | -98.77561  |
| 18054 | Passeriformes   | Cardinalidae  | <i>Passerina</i>     | <i>caerulea</i>       | M | San Antonio Viejo Ranch | 26.71556  | -98.77561  |
| 18055 | Passeriformes   | Icteridae     | <i>Icterus</i>       | <i>cucullatus</i>     | M | San Antonio Viejo Ranch | 26.7379   | -98.77509  |
| 18056 | Passeriformes   | Icteridae     | <i>Sturnella</i>     | <i>sp.</i>            | F | San Antonio Viejo Ranch | 26.71556  | -98.77561  |
| 18088 | Passeriformes   | Cardinalidae  | <i>Passerina</i>     | <i>ciris</i>          | F | San Antonio Viejo Ranch | 26.95606  | -98.78828  |
| 18044 | Passeriformes   | Cardinalidae  | <i>Passerina</i>     | <i>ciris</i>          | M | San Antonio Viejo Ranch | 26.7599   | -98.77705  |
| 23678 | Passeriformes   | Parulidae     | <i>Setophaga</i>     | <i>americana</i>      | M | El Sauz Ranch           | 26.613433 | -97.4451   |
| 18086 | Passeriformes   | Paridae       | <i>Baeolophus</i>    | <i>atricristatus</i>  | M | San Antonio Viejo Ranch | 26.79981  | -98.75737  |
| 23690 | Passeriformes   | Parulidae     | <i>Leiothlypis</i>   | <i>peregrina</i>      | F | El Sauz Ranch           | 26.610261 | -97.459483 |
| 23689 | Passeriformes   | Parulidae     | <i>Setophaga</i>     | <i>petechia</i>       | F | El Sauz Ranch           | 26.610261 | -97.459483 |
| 23688 | Passeriformes   | Cardinalidae  | <i>Passerina</i>     | <i>caerulea</i>       | M | El Sauz Ranch           | 26.59933  | -97.53178  |
| 23687 | Passeriformes   | Cardinalidae  | <i>Passerina</i>     | <i>caerulea</i>       | M | El Sauz Ranch           | 26.59933  | -97.53178  |
| 23686 | Passeriformes   | Cardinalidae  | <i>Passerina</i>     | <i>caerulea</i>       | M | El Sauz Ranch           | 26.59933  | -97.53178  |
| 23685 | Passeriformes   | Cardinalidae  | <i>Passerina</i>     | <i>ciris</i>          | F | El Sauz Ranch           | 26.59933  | -97.53178  |
| 23684 | Passeriformes   | Cardinalidae  | <i>Passerina</i>     | <i>ciris</i>          | M | El Sauz Ranch           | 26.59933  | -97.53178  |
| 23683 | Passeriformes   | Cardinalidae  | <i>Passerina</i>     | <i>ciris</i>          | F | El Sauz Ranch           | 26.59933  | -97.53178  |
| 23682 | Passeriformes   | Cardinalidae  | <i>Passerina</i>     | <i>caerulea</i>       | F | El Sauz Ranch           | 26.610261 | -97.459483 |
| 23681 | Passeriformes   | Cardinalidae  | <i>Passerina</i>     | <i>caerulea</i>       | M | El Sauz Ranch           | 26.610261 | -97.459483 |
| 23692 | Passeriformes   | Turdidae      | <i>Catharus</i>      | <i>minimus</i>        | F | El Sauz Ranch           | 26.610261 | -97.459483 |
| 23679 | Passeriformes   | Cardinalidae  | <i>Passerina</i>     | <i>ciris</i>          | M | El Sauz Ranch           | 26.610261 | -97.459483 |
| 23693 | Passeriformes   | Parulidae     | <i>Setophaga</i>     | <i>magnolia</i>       | M | El Sauz Ranch           | 26.60893  | -97.51284  |
| 23677 | Passeriformes   | Parulidae     | <i>Mniotilta</i>     | <i>varia</i>          | M | El Sauz Ranch           | 26.610261 | -97.459483 |
| 23676 | Passeriformes   | Parulidae     | <i>Mniotilta</i>     | <i>varia</i>          | M | El Sauz Ranch           | 26.610261 | -97.459483 |
| 23675 | Passeriformes   | Parulidae     | <i>Setophaga</i>     | <i>magnolia</i>       | M | El Sauz Ranch           | 26.610261 | -97.459483 |
| 23674 | Passeriformes   | Parulidae     | <i>Setophaga</i>     | <i>virens</i>         | F | El Sauz Ranch           | 26.610261 | -97.459483 |
| 23673 | Passeriformes   | Vireonidae    | <i>Vireo</i>         | <i>gilvus</i>         | F | El Sauz Ranch           | 26.610261 | -97.459483 |
| 23672 | Passeriformes   | Vireonidae    | <i>Vireo</i>         | <i>solitarius</i>     | F | El Sauz Ranch           | 26.610261 | -97.459483 |
| 23671 | Passeriformes   | Parulidae     | <i>Cardellina</i>    | <i>canadensis</i>     | M | El Sauz Ranch           | 26.610261 | -97.459483 |
| 18005 | Passeriformes   | Cardinalidae  | <i>Passerina</i>     | <i>ciris</i>          | M | San Antonio Viejo Ranch | 26.95606  | -98.78828  |
| 23669 | Passeriformes   | Hirundinidae  | <i>Tachycineta</i>   | <i>bicolor</i>        | F | El Sauz Ranch           |           |            |
| 17997 | Passeriformes   | Tyrannidae    | <i>Pitangus</i>      | <i>sulphuratus</i>    | F | San Antonio Viejo Ranch | 26.75448  | -98.7169   |
| 23667 | Passeriformes   | Passerellidae | <i>Spizella</i>      | <i>pallida</i>        | M | El Sauz Ranch           | 26.610261 | -97.459483 |
| 23680 | Passeriformes   | Cardinalidae  | <i>Piranga</i>       | <i>olivacea</i>       | F | El Sauz Ranch           | 26.610261 | -97.459483 |
| 18104 | Passeriformes   | Icteridae     | <i>Icterus</i>       | <i>bullockii</i>      | F | San Antonio Viejo Ranch | 26.78484  | -98.73244  |
| 23666 | Passeriformes   | Passerellidae | <i>Spizella</i>      | <i>pallida</i>        | F | El Sauz Ranch           | 26.610261 | -97.459483 |
| 18089 | Passeriformes   | Passerellidae | <i>Chondestes</i>    | <i>grammacus</i>      | F | San Antonio Viejo Ranch | 26.78484  | -98.73244  |
| 18090 | Passeriformes   | Icteridae     | <i>Icterus</i>       | <i>bullockii</i>      | F | San Antonio Viejo Ranch | 26.73616  | -98.72861  |
| 18091 | Passeriformes   | Hirundinidae  | <i>Hirundo</i>       | <i>rustica</i>        | M | San Antonio Viejo Ranch | 26.95606  | -98.78828  |
| 18092 | Charadriiformes | Charadriidae  | <i>Charadrius</i>    | <i>vociferus</i>      | M | San Antonio Viejo Ranch | 26.95635  | -98.91117  |
| 18094 | Passeriformes   | Mimidae       | <i>Toxostoma</i>     | <i>longirostre</i>    | F | San Antonio Viejo Ranch | 26.79981  | -98.75737  |
| 18095 | Cuculiformes    | Cuculidae     | <i>Coccyzus</i>      | <i>americanus</i>     | M | San Antonio Viejo Ranch | 26.78484  | -98.73244  |
| 18096 | Passeriformes   | Icteridae     | <i>Quiscalus</i>     | <i>mexicanus</i>      | F | San Antonio Viejo Ranch | 26.73616  | -98.72861  |
| 18097 | Passeriformes   | Vireonidae    | <i>Vireo</i>         | <i>griseus</i>        | F | San Antonio Viejo Ranch | 26.95606  | -98.78828  |
| 18098 | Passeriformes   | Paridae       | <i>Baeolophus</i>    | <i>atricristatus</i>  | M | San Antonio Viejo Ranch | 26.7549   | -98.77705  |
| 18099 | Passeriformes   | Icteridae     | <i>Molothrus</i>     | <i>aeneus</i>         | M | San Antonio Viejo Ranch | 26.73616  | -98.73244  |
| 23691 | Passeriformes   | Passerellidae | <i>Chondestes</i>    | <i>grammacus</i>      | M | El Sauz Ranch           | 26.610261 | -97.459483 |
| 18103 | Passeriformes   | Cardinalidae  | <i>Passerina</i>     | <i>versicolor</i>     | F | San Antonio Viejo Ranch | 26.7549   | -98.77705  |
| 18087 | Passeriformes   | Mimidae       | <i>Toxostoma</i>     | <i>longirostre</i>    | F | San Antonio Viejo Ranch | 26.79981  | -98.75737  |
| 23721 | Passeriformes   | Icteridae     | <i>Icterus</i>       | <i>galbula</i>        | M | El Sauz Ranch           | 26.59933  | -97.53178  |
| 23702 | Passeriformes   | Icteridae     | <i>Icterus</i>       | <i>cucullatus</i>     | M | El Sauz Ranch           | 26.59933  | -97.53178  |
| 23701 | Passeriformes   | Parulidae     | <i>Parkesia</i>      | <i>noveboracensis</i> | F | El Sauz Ranch           | 26.60893  | -97.51284  |
| 23700 | Passeriformes   | Cardinalidae  | <i>Spiza</i>         | <i>americana</i>      | F | El Sauz Ranch           | 26.59933  | -97.53178  |
| 23699 | Passeriformes   | Parulidae     | <i>Setophaga</i>     | <i>magnolia</i>       | M | El Sauz Ranch           | 26.610261 | -97.459483 |
| 23698 | Passeriformes   | Mimidae       | <i>Mimus</i>         | <i>polyglottos</i>    | M | El Sauz Ranch           | 26.610261 | -97.459483 |
| 23697 | Cuculiformes    | Cuculidae     | <i>Coccyzus</i>      | <i>americanus</i>     | M | El Sauz Ranch           | 26.60893  | -97.51284  |
| 18031 | Passeriformes   | Passerellidae | <i>Chondestes</i>    | <i>grammacus</i>      | M | San Antonio Viejo Ranch | 26.90949  | -98.84032  |
| 23696 | Passeriformes   | Tyrannidae    | <i>Myiarchus</i>     | <i>tyrannulus</i>     | M | El Sauz Ranch           | 26.59933  | -97.53178  |
| 23695 | Passeriformes   | Parulidae     | <i>Geothlypis</i>    | <i>trichas</i>        | M | El Sauz Ranch           | 26.59933  | -97.53178  |
| 23694 | Passeriformes   | Parulidae     | <i>Setophaga</i>     | <i>petechia</i>       | F | El Sauz Ranch           | 26.610261 | -97.459483 |
| 18100 | Passeriformes   | Cardinalidae  | <i>Passerina</i>     | <i>versicolor</i>     | M | San Antonio Viejo Ranch | 26.7549   | -98.77705  |
| 23526 | Passeriformes   | Mimidae       | <i>Toxostoma</i>     | <i>longirostre</i>    | M | San Antonio Viejo Ranch | 26.94284  | -98.78624  |

|       |                 |                  |                        |                        |   |                         |           |            |
|-------|-----------------|------------------|------------------------|------------------------|---|-------------------------|-----------|------------|
| 23539 | Passeriformes   | Parulidae        | <i>Setophaga</i>       | <i>ruticilla</i>       | M | El Sauz Ranch           | 26.6102   | -97.45958  |
| 23512 | Passeriformes   | Parulidae        | <i>Geothlypis</i>      | <i>trichas</i>         | M | El Sauz Ranch           | 26.51423  | -97.48663  |
| 23513 | Passeriformes   | Passerellidae    | <i>Zonotrichia</i>     | <i>leucophrys</i>      | M | San Antonio Viejo Ranch | 26.960306 |            |
| 23514 | Falconiformes   | Falconidae       | <i>Falco</i>           | <i>sparverius</i>      | M | San Antonio Viejo Ranch | 26.83624  | -98.79912  |
| 23516 | Passeriformes   | Bombycillidae    | <i>Bombycilla</i>      | <i>cedrorum</i>        | M | San Antonio Viejo Ranch | 26.71556  | -98.77561  |
| 23517 | Passeriformes   | Cardinalidae     | <i>Piranga</i>         | <i>rubra</i>           | M | El Sauz Ranch           | 26.61329  | -97.49564  |
| 23518 | Passeriformes   | Cardinalidae     | <i>Passerina</i>       | <i>cyanea</i>          | M | El Sauz Ranch           | 26.60893  | -97.51284  |
| 23519 | Passeriformes   | Icteridae        | <i>Agelaius</i>        | <i>phoeniceus</i>      | F | San Antonio Viejo Ranch | 26.94384  | -98.78624  |
| 23520 | Passeriformes   | Icteridae        | <i>Agelaius</i>        | <i>phoeniceus</i>      | F | San Antonio Viejo Ranch | 26.94384  | -98.78624  |
| 23521 | Passeriformes   | Mimidae          | <i>Toxostoma</i>       | <i>curvirostre</i>     | F | San Antonio Viejo Ranch | 26.94384  | -98.78624  |
| 23522 | Passeriformes   | Cardinalidae     | <i>Cardinalis</i>      | <i>cardinalis</i>      | M | San Antonio Viejo Ranch | 26.95606  | -98.78828  |
| 23523 | Passeriformes   | Tyrannidae       | <i>Empidonax</i>       | <i>sp.</i>             | F | San Antonio Viejo Ranch | 26.94284  | -98.78624  |
| 23510 | Passeriformes   | Alaudidae        | <i>Eremophila</i>      | <i>alpestris</i>       | F | El Sauz Ranch           | 26.52238  | -97.501    |
| 23525 | Passeriformes   | Cardinalidae     | <i>Passerina</i>       | <i>ciris</i>           | M | San Antonio Viejo Ranch | 26.94284  | -98.78624  |
| 23509 | Passeriformes   | Troglodytidae    | <i>Campylorhynchus</i> | <i>brunneicapillus</i> | F | El Sauz Ranch           |           |            |
| 23527 | Piciformes      | Picidae          | <i>Melanerpes</i>      | <i>aurifrons</i>       | F | San Antonio Viejo Ranch | 26.94284  | -98.78624  |
| 23528 | Passeriformes   | Cardinalidae     | <i>Cardinalis</i>      | <i>cardinalis</i>      | M | San Antonio Viejo Ranch | 26.94284  | -98.78624  |
| 23529 | Passeriformes   | Icteridae        | <i>Agelaius</i>        | <i>phoeniceus</i>      | M | San Antonio Viejo Ranch | 26.95606  | -98.78828  |
| 23530 | Passeriformes   | Passerellidae    | <i>Arremonops</i>      | <i>rufivirgatus</i>    | F | San Antonio Viejo Ranch | 26.94284  | -98.78624  |
| 23531 | Passeriformes   | Cardinalidae     | <i>Passerina</i>       | <i>ciris</i>           | F | San Antonio Viejo Ranch | 26.94284  | -98.78624  |
| 23532 | Passeriformes   | Cardinalidae     | <i>Pheucticus</i>      | <i>ludovicianus</i>    | M | El Sauz Ranch           | 26.61295  | -97.53335  |
| 23533 | Passeriformes   | Icteridae        | <i>Xanthocephalus</i>  | <i>xanthocephalus</i>  | M | El Sauz Ranch           | 26.6102   | -97.45958  |
| 23534 | Passeriformes   | Cardinalidae     | <i>Piranga</i>         | <i>rubra</i>           | M | El Sauz Ranch           | 26.60138  | -97.50227  |
| 23535 | Passeriformes   | Cardinalidae     | <i>Piranga</i>         | <i>rubra</i>           | F | El Sauz Ranch           | 26.60138  | -97.50227  |
| 23536 | Passeriformes   | Parulidae        | <i>Setophaga</i>       | <i>fusca</i>           | F | El Sauz Ranch           | 26.6102   | -97.45958  |
| 23537 | Passeriformes   | Parulidae        | <i>Setophaga</i>       | <i>ruticilla</i>       | M | El Sauz Ranch           | 26.6102   | -97.45958  |
| 23480 | Passeriformes   | Cardinalidae     | <i>Cardinalis</i>      | <i>cardinalis</i>      | M | San Antonio Viejo Ranch | 26.95606  | -98.78828  |
| 23524 | Passeriformes   | Tyrannidae       | <i>Empidonax</i>       | <i>traillii</i>        | F | San Antonio Viejo Ranch | 26.94284  | -98.78624  |
| 23481 | Passeriformes   | Cardinalidae     | <i>Cardinalis</i>      | <i>sinuatus</i>        | M | San Antonio Viejo Ranch | 26.95606  | -98.78828  |
| 23482 | Passeriformes   | Cardinalidae     | <i>Cardinalis</i>      | <i>sinuatus</i>        | F | San Antonio Viejo Ranch | 26.95606  | -98.78828  |
| 23483 | Passeriformes   | Troglodytidae    | <i>Thryomanes</i>      | <i>bewickii</i>        | F | El Sauz Ranch           |           |            |
| 17996 | Passeriformes   | Tyrannidae       | <i>Myiarchus</i>       | <i>tyrannulus</i>      | M | San Antonio Viejo Ranch | 26.82904  | -98.73529  |
| 23485 | Passeriformes   | Corvidae         | <i>Cyanocorax</i>      | <i>yncas</i>           | F | San Antonio Viejo Ranch | 26.95582  | -98.8911   |
| 18007 | Passeriformes   | Tyrannidae       | <i>Myiarchus</i>       | <i>cinerascens</i>     | M | San Antonio Viejo Ranch | 26.96257  | -98.85157  |
| 23488 | Passeriformes   | Tyrannidae       | <i>Pitangus</i>        | <i>sulphuratus</i>     | M | San Antonio Viejo Ranch | 26.75448  | -98.7169   |
| 23489 | Passeriformes   | Icteridae        | <i>Icterus</i>         | <i>spurius</i>         | F | San Antonio Viejo Ranch | 26.95606  | -98.78828  |
| 23490 | Passeriformes   | Hirundinidae     | <i>Progne</i>          | <i>subis</i>           | M | El Sauz Ranch           |           |            |
| 23491 | Passeriformes   | Tyrannidae       | <i>Myiarchus</i>       | <i>crinitus</i>        | F | San Antonio Viejo Ranch | 26.95606  | -98.78828  |
| 23492 | Accipitriformes | Accipitridae     | <i>Accipiter</i>       | <i>cooperii</i>        | M | San Antonio Viejo Ranch |           |            |
| 23493 | Passeriformes   | Tyrannidae       | <i>Tyrannus</i>        | <i>couchii</i>         | F | San Antonio Viejo Ranch | 26.78484  | -98.73244  |
| 23511 | Passeriformes   | Parulidae        | <i>Leiostylypis</i>    | <i>celata</i>          | F | El Sauz Ranch           | 26.51789  | -97.50285  |
| 23495 | Charadriiformes | Recurvirostridae | <i>Recurvirostra</i>   | <i>americana</i>       | M | El Sauz Ranch           | 26.51423  | -97.48663  |
| 23540 | Passeriformes   | Tyrannidae       | <i>Tyrannus</i>        | <i>tyrannus</i>        | F | El Sauz Ranch           | 26.61349  | -97.4705   |
| 23503 | Passeriformes   | Parulidae        | <i>Parkesia</i>        | <i>motacilla</i>       | F | San Antonio Viejo Ranch | 26.95606  | -98.78828  |
| 23506 | Passeriformes   | Parulidae        | <i>Geothlypis</i>      | <i>trichas</i>         | M | San Antonio Viejo Ranch | 26.95606  | -98.78828  |
| 23507 | Passeriformes   | Troglodytidae    | <i>Troglodytes</i>     | <i>aedon</i>           | F | San Antonio Viejo Ranch | 26.95606  | -98.78828  |
| 23508 | Passeriformes   | Laniidae         | <i>Lanius</i>          | <i>ludovicianus</i>    | F | El Sauz Ranch           | 26.54959  | -97.44782  |
| 23494 | Charadriiformes | Scolopacidae     | <i>Tringa</i>          | <i>semipalmata</i>     | F | El Sauz Ranch           | 26.613433 | -97.4451   |
| 23584 | Passeriformes   | Parulidae        | <i>Parkesia</i>        | <i>noveboracensis</i>  | F | El Sauz Ranch           | 26.60893  | -97.51284  |
| 23538 | Passeriformes   | Parulidae        | <i>Setophaga</i>       | <i>ruticilla</i>       | M | El Sauz Ranch           | 26.6102   | -97.45958  |
| 23571 | Passeriformes   | Bombycillidae    | <i>Bombycilla</i>      | <i>cedrorum</i>        | F | San Antonio Viejo Ranch | 26.71556  | -98.77561  |
| 23572 | Passeriformes   | Passerellidae    | <i>Pooecetes</i>       | <i>gramineus</i>       | M | San Antonio Viejo Ranch | 26.95606  | -98.78828  |
| 23573 | Passeriformes   | Passerellidae    | <i>Melospiza</i>       | <i>lincolni</i>        | F | San Antonio Viejo Ranch | 26.92636  | -98.88522  |
| 23574 | Passeriformes   | Passerellidae    | <i>Peucaea</i>         | <i>cassinii</i>        | M | San Antonio Viejo Ranch | 26.83624  | -98.79912  |
| 23575 | Passeriformes   | Fringillidae     | <i>Spinus</i>          | <i>tristis</i>         | M | San Antonio Viejo Ranch | 26.95606  | -98.78828  |
| 23576 | Passeriformes   | Passerellidae    | <i>Spizella</i>        | <i>pusilla</i>         | M | San Antonio Viejo Ranch | 26.960344 | -98.890153 |
| 23577 | Passeriformes   | Tyrannidae       | <i>Empidonax</i>       | <i>minimus</i>         | M | San Antonio Viejo Ranch | 26.7549   | -98.77705  |
| 23578 | Passeriformes   | Fringillidae     | <i>Spinus</i>          | <i>tristis</i>         | F | San Antonio Viejo Ranch | 26.7549   | -98.77705  |
| 23579 | Charadriiformes | Charadriidae     | <i>Charadrius</i>      | <i>wilsonia</i>        | M | El Sauz Ranch           | 26.613433 | -97.4451   |
| 23580 | Passeriformes   | Fringillidae     | <i>Spinus</i>          | <i>psaltria</i>        | F | San Antonio Viejo Ranch | 26.95606  | -98.78828  |
| 23581 | Passeriformes   | Vireonidae       | <i>Vireo</i>           | <i>griseus</i>         | F | San Antonio Viejo Ranch | 26.960344 | -98.890153 |
| 23569 | Charadriiformes | Scolopacidae     | <i>Bartramia</i>       | <i>longicauda</i>      | M | El Sauz Ranch           | 26.579172 | -97.452342 |
| 23583 | Passeriformes   | Mimidae          | <i>Toxostoma</i>       | <i>longirostre</i>     | M | El Sauz Ranch           | 26.61333  | -97.49274  |

|       |                 |                |                     |                      |   |                         |           |            |
|-------|-----------------|----------------|---------------------|----------------------|---|-------------------------|-----------|------------|
| 23568 | Charadriiformes | Scolopacidae   | <i>Calidris</i>     | <i>himantopus</i>    | M | El Sauz Ranch           | 26.60536  | -97.47994  |
| 23585 | Passeriformes   | Regulidae      | <i>Regulus</i>      | <i>calendula</i>     | F | San Antonio Viejo Ranch | 26.95606  | -98.78828  |
| 23586 | Passeriformes   | Parulidae      | <i>Leiothlypis</i>  | <i>peregrina</i>     | F | El Sauz Ranch           | 26.6102   | -97.45958  |
| 23587 | Passeriformes   | Passerellidae  | <i>Passerculus</i>  | <i>sandwichensis</i> | M | El Sauz Ranch           | 26.51789  | -97.50285  |
| 23588 | Passeriformes   | Parulidae      | <i>Setophaga</i>    | <i>coronata</i>      | F | El Sauz Ranch           | 26.51789  | -97.50285  |
| 23589 | Passeriformes   | Parulidae      | <i>Setophaga</i>    | <i>coronata</i>      | F | El Sauz Ranch           | 26.51797  | -97.5004   |
| 23590 | Anseriformes    | Anatidae       | <i>Aythya</i>       | <i>americana</i>     | M | El Sauz Ranch           | 26.613433 | -97.4451   |
| 23592 | Anseriformes    | Anatidae       | <i>Spatula</i>      | <i>discors</i>       | F | El Sauz Ranch           | 26.60536  | -97.47994  |
| 23593 | Anseriformes    | Anatidae       | <i>Spatula</i>      | <i>discors</i>       | M | El Sauz Ranch           | 26.551203 | -97.462322 |
| 23594 | Anseriformes    | Anatidae       | <i>Dendrocygna</i>  | <i>autumnalis</i>    | M | San Antonio Viejo Ranch | 26.74447  | -98.71878  |
| 23595 | Accipitriformes | Accipitridae   | <i>Parabuteo</i>    | <i>unicinctus</i>    | F | El Sauz Ranch           | 26.51909  | -97.50004  |
| 23596 | Accipitriformes | Accipitridae   | <i>Geranoaetus</i>  | <i>albicaudatus</i>  | M | El Sauz Ranch           | 26.55472  | -97.44869  |
| 23582 | Passeriformes   | Corvidae       | <i>Cyanocorax</i>   | <i>yncas</i>         | M | El Sauz Ranch           | 26.60893  | -97.51284  |
| 23555 | Columbiformes   | Columbidae     | <i>Columbina</i>    | <i>passerina</i>     | M | El Sauz Ranch           | 26.59933  | -97.53178  |
| 23541 | Charadriiformes | Scolopacidae   | <i>Steganopus</i>   | <i>tricolor</i>      | F | El Sauz Ranch           | 26.60536  | -97.47994  |
| 23542 | Passeriformes   | Icteridae      | <i>Icterus</i>      | <i>graduacauda</i>   | M | El Sauz Ranch           | 26.612883 | -97.522739 |
| 23543 | Galliformes     | Odontophoridae | <i>Colinus</i>      | <i>virginianus</i>   | F | El Sauz Ranch           | 26.54959  | -97.44782  |
| 23544 | Passeriformes   | Turdidae       | <i>Catharus</i>     | <i>minimus</i>       | M | El Sauz Ranch           | 26.613433 | -97.4451   |
| 23545 | Passeriformes   | Parulidae      | <i>Cardellina</i>   | <i>canadensis</i>    | M | San Antonio Viejo Ranch | 26.94284  | -98.78624  |
| 23546 | Passeriformes   | Troglodytidae  | <i>Thryothorus</i>  | <i>ludovicianus</i>  | F | El Sauz Ranch           | 26.61316  | -97.5002   |
| 23547 | Columbiformes   | Columbidae     | <i>Leptotila</i>    | <i>verreauxi</i>     | F | El Sauz Ranch           | 26.60138  | -97.50227  |
| 23548 | Piciformes      | Picidae        | <i>Picoides</i>     | <i>scalaris</i>      | M | El Sauz Ranch           | 26.611292 | -97.512519 |
| 23549 | Passeriformes   | Tyrannidae     | <i>Myiarchus</i>    | <i>crinitus</i>      | F | El Sauz Ranch           | 26.611292 | -97.512519 |
| 23550 | Passeriformes   | Tyrannidae     | <i>Myiarchus</i>    | <i>tyrannulus</i>    | M | El Sauz Ranch           | 26.611292 | -97.512519 |
| 23551 | Passeriformes   | Passerellidae  | <i>Arremonops</i>   | <i>rufivirgatus</i>  | M | El Sauz Ranch           | 26.61073  | -97.53555  |
| 23552 | Passeriformes   | Fringillidae   | <i>Spinus</i>       | <i>psaltria</i>      | M | El Sauz Ranch           | 26.59933  | -97.53178  |
| 23570 | Charadriiformes | Scolopacidae   | <i>Tringa</i>       | <i>solitaria</i>     | F | El Sauz Ranch           | 26.60893  | -97.51284  |
| 23554 | Passeriformes   | Passerellidae  | <i>Peucaea</i>      | <i>cassini</i>       | F | El Sauz Ranch           | 26.613433 | -97.4451   |
| 23556 | Passeriformes   | Cardinalidae   | <i>Cardinalis</i>   | <i>sinuatus</i>      | M | El Sauz Ranch           | 26.59933  | -97.53178  |
| 23557 | Passeriformes   | Cardinalidae   | <i>Cardinalis</i>   | <i>cardinalis</i>    | M | El Sauz Ranch           | 26.61073  | -97.53555  |
| 23558 | Passeriformes   | Parulidae      | <i>Setophaga</i>    | <i>petechia</i>      | M | El Sauz Ranch           | 26.6102   | -97.45958  |
| 23559 | Passeriformes   | Parulidae      | <i>Setophaga</i>    | <i>magnolia</i>      | F | El Sauz Ranch           | 26.6102   | -97.45958  |
| 23560 | Passeriformes   | Hirundinidae   | <i>Hirundo</i>      | <i>rustica</i>       | M | El Sauz Ranch           | 26.61073  | -97.53555  |
| 23561 | Passeriformes   | Hirundinidae   | <i>Riparia</i>      | <i>riparia</i>       | F | El Sauz Ranch           | 26.58728  | -97.45683  |
| 23562 | Cuculiformes    | Cuculidae      | <i>Coccyzus</i>     | <i>americanus</i>    | M | El Sauz Ranch           | 26.61073  | -97.53555  |
| 23563 | Passeriformes   | Parulidae      | <i>Setophaga</i>    | <i>petechia</i>      | M | El Sauz Ranch           | 26.59487  | -97.47092  |
| 23564 | Passeriformes   | Parulidae      | <i>Setophaga</i>    | <i>pensylvanica</i>  | F | El Sauz Ranch           | 26.613433 | -97.4451   |
| 23565 | Passeriformes   | Parulidae      | <i>Setophaga</i>    | <i>pensylvanica</i>  | F | El Sauz Ranch           | 26.61319  | -97.50795  |
| 23566 | Passeriformes   | Remizidae      | <i>Auriparus</i>    | <i>flaviceps</i>     | M | El Sauz Ranch           | 26.61073  | -97.53555  |
| 23567 | Passeriformes   | Tyrannidae     | <i>Contopus</i>     | <i>cooperi</i>       | F | El Sauz Ranch           | 26.61319  | -97.50795  |
| 23553 | Passeriformes   | Fringillidae   | <i>Spinus</i>       | <i>psaltria</i>      | F | El Sauz Ranch           | 26.59933  | -97.53178  |
| 24143 | Passeriformes   | Corvidae       | <i>Cyanocorax</i>   | <i>yncas</i>         | F | El Sauz Ranch           | 26.59933  | -97.53178  |
| 17783 | Passeriformes   | Tyrannidae     | <i>Pyrocephalus</i> | <i>rubinus</i>       | M | San Antonio Viejo Ranch | 26.83624  | -98.79912  |
| 23708 | Passeriformes   | Passerellidae  | <i>Chondestes</i>   | <i>grammacus</i>     | F | El Sauz Ranch           | 26.60893  | -97.51284  |
| 23707 | Passeriformes   | Paridae        | <i>Baeolophus</i>   | <i>atricristatus</i> | M | El Sauz Ranch           | 26.60893  | -97.51284  |
| 23706 | Passeriformes   | Parulidae      | <i>Vermivora</i>    | <i>chrysoptera</i>   | F | El Sauz Ranch           | 26.60893  | -97.51284  |
| 23705 | Passeriformes   | Cardinalidae   | <i>Piranga</i>      | <i>rubra</i>         | M | El Sauz Ranch           | 26.59933  | -97.53178  |
| 18032 | Passeriformes   | Tyrannidae     | <i>Tyrannus</i>     | <i>forficatus</i>    | M | San Antonio Viejo Ranch | 26.90949  | -98.84032  |
| 23599 | Passeriformes   | Parulidae      | <i>Setophaga</i>    | <i>virens</i>        | F | El Sauz Ranch           | 26.610261 | -97.459483 |
| 23711 | Passeriformes   | Parulidae      | <i>Setophaga</i>    | <i>castanea</i>      | F | El Sauz Ranch           | 26.59933  | -97.53178  |
| 23472 | Charadriiformes | Scolopacidae   | <i>Numenius</i>     | <i>americanus</i>    | F | El Sauz Ranch           | 26.613433 | -97.4451   |
| 23473 | Charadriiformes | Scolopacidae   | <i>Arenaria</i>     | <i>interpres</i>     | F | El Sauz Ranch           | 26.613433 | -97.4451   |
| 17732 | Passeriformes   | Mimidae        | <i>Toxostoma</i>    | <i>curvirostre</i>   | M | San Antonio Viejo Ranch | 26.83624  | -98.79912  |
| 24142 | Charadriiformes | Scolopacidae   | <i>Calidris</i>     | <i>himantopus</i>    | F | El Sauz Ranch           | 26.613433 | -97.4451   |
| 17915 | Passeriformes   | Cardinalidae   | <i>Passerina</i>    | <i>ciris</i>         | M | San Antonio Viejo Ranch | 26.95606  | -98.78828  |
| 24144 | Charadriiformes | Scolopacidae   | <i>Calidris</i>     | <i>himantopus</i>    | M | El Sauz Ranch           | 26.613433 | -97.4451   |
| 24145 | Pelicaniformes  | Ardeidae       | <i>Butorides</i>    | <i>virescens</i>     | F | El Sauz Ranch           | 26.58823  | -97.47744  |
| 24146 | Passeriformes   | Parulidae      | <i>Leiothlypis</i>  | <i>celata</i>        | M | San Antonio Viejo Ranch | 26.95606  | -98.78828  |
| 24147 | Passeriformes   | Parulidae      | <i>Leiothlypis</i>  | <i>celata</i>        | F | San Antonio Viejo Ranch | 26.95606  | -98.78828  |
| 24148 | Passeriformes   | Parulidae      | <i>Leiothlypis</i>  | <i>ruficapilla</i>   | F | San Antonio Viejo Ranch | 26.95606  | -98.78828  |
| 24149 | Passeriformes   | Parulidae      | <i>Leiothlypis</i>  | <i>ruficapilla</i>   | M | San Antonio Viejo Ranch | 26.95606  | -98.78828  |
| 24150 | Passeriformes   | Parulidae      | <i>Leiothlypis</i>  | <i>ruficapilla</i>   | F | San Antonio Viejo Ranch | 26.95606  | -98.78828  |
| 23486 | Passeriformes   | Fringillidae   | <i>Spinus</i>       | <i>psaltria</i>      | M | El Sauz Ranch           | 26.60893  | -97.51284  |

|       |                  |                |                       |                       |   |                         |           |            |
|-------|------------------|----------------|-----------------------|-----------------------|---|-------------------------|-----------|------------|
| 24152 | Passeriformes    | Parulidae      | <i>Leiothlypis</i>    | <i>peregrina</i>      | F | San Antonio Viejo Ranch | 26.95606  | -98.78828  |
| 23479 | Passeriformes    | Hirundinidae   | <i>Progne</i>         | <i>subis</i>          | F | El Sauz Ranch           |           |            |
| 24154 | Passeriformes    | Paridae        | <i>Baeolophus</i>     | <i>atricristatus</i>  | M | San Antonio Viejo Ranch | 26.95606  | -98.78828  |
| 24155 | Passeriformes    | Parulidae      | <i>Leiothlypis</i>    | <i>celata</i>         | M | San Antonio Viejo Ranch | 26.95606  | -98.78828  |
| 24141 | Passeriformes    | Cardinalidae   | <i>Spiza</i>          | <i>americana</i>      | M | El Sauz Ranch           | 26.577659 | -97.451671 |
| 17978 | Passeriformes    | Paridae        | <i>Baeolophus</i>     | <i>atricristatus</i>  | M | San Antonio Viejo Ranch | 26.83624  | -98.79912  |
| 17995 | Passeriformes    | Tyrannidae     | <i>Myiarchus</i>      | <i>tyrannulus</i>     | F | San Antonio Viejo Ranch | 26.82904  | -98.73529  |
| 17994 | Passeriformes    | Icteridae      | <i>Molothrus</i>      | <i>aeneus</i>         | M | San Antonio Viejo Ranch | 26.82904  | -98.73529  |
| 17993 | Piciformes       | Picidae        | <i>Picoides</i>       | <i>scalaris</i>       | F | San Antonio Viejo Ranch | 26.79738  | -98.78442  |
| 23714 | Caprimulgiformes | Trochilidae    | <i>Amazilia</i>       | <i>yucatanensis</i>   | M | El Sauz Ranch           | 26.60893  | -97.51284  |
| 23713 | Passeriformes    | Turdidae       | <i>Catharus</i>       | <i>ustulatus</i>      | F | El Sauz Ranch           | 26.60893  | -97.51284  |
| 23712 | Passeriformes    | Icteridae      | <i>Icterus</i>        | <i>graduacauda</i>    | F | El Sauz Ranch           | 26.59933  | -97.53178  |
| 17992 | Passeriformes    | Parulidae      | <i>Setophaga</i>      | <i>magnolia</i>       | M | San Antonio Viejo Ranch | 26.75448  | -98.7169   |
| 17991 | Passeriformes    | Cardinalidae   | <i>Cardinalis</i>     | <i>sinuatus</i>       | M | San Antonio Viejo Ranch | 26.83624  | -98.79912  |
| 17990 | Passeriformes    | Mimidae        | <i>Mimus</i>          | <i>polyglottos</i>    | M | San Antonio Viejo Ranch | 26.83624  | -98.79912  |
| 23600 | Passeriformes    | Sturnidae      | <i>Sturnus</i>        | <i>vulgaris</i>       | M | El Sauz Ranch           |           |            |
| 17834 | Charadriiformes  | Charadriidae   | <i>Charadrius</i>     | <i>vociferus</i>      | M | San Antonio Viejo Ranch | 26.77173  | -98.71939  |
| 23703 | Passeriformes    | Parulidae      | <i>Leiothlypis</i>    | <i>peregrina</i>      | M | El Sauz Ranch           | 26.60893  | -97.51284  |
| 17870 | Piciformes       | Picidae        | <i>Melanerpes</i>     | <i>aurifrons</i>      | F | San Antonio Viejo Ranch | 26.83624  | -98.79912  |
| 23710 | Passeriformes    | Fringillidae   | <i>Spinus</i>         | <i>psaltria</i>       | M | El Sauz Ranch           | 26.59933  | -97.53178  |
| 17725 | Passeriformes    | Paridae        | <i>Baeolophus</i>     | <i>atricristatus</i>  | M | San Antonio Viejo Ranch | 26.90949  | -98.84032  |
| 23709 | Passeriformes    | Tyrannidae     | <i>Tyrannus</i>       | <i>forficatus</i>     | F | El Sauz Ranch           | 26.60893  | -97.51284  |
| 23468 | Passeriformes    | Passerellidae  | <i>Arremonops</i>     | <i>rufivirgatus</i>   | M | El Sauz Ranch           | 26.59933  | -97.53178  |
| 17954 | Passeriformes    | Tyrannidae     | <i>Pyrocephalus</i>   | <i>rubinus</i>        | F | San Antonio Viejo Ranch | 26.83624  | -98.79912  |
| 17946 | Passeriformes    | Icteridae      | <i>Icterus</i>        | <i>bullockii</i>      | M | San Antonio Viejo Ranch | 26.82904  | -98.73529  |
| 17943 | Galliformes      | Odontophoridae | <i>Colinus</i>        | <i>virginianus</i>    | M | San Antonio Viejo Ranch | 26.95606  | -98.73529  |
| 17941 | Passeriformes    | Tyrannidae     | <i>Tyrannus</i>       | <i>couchii</i>        | M | San Antonio Viejo Ranch | 26.83624  | -98.79912  |
| 17939 | Passeriformes    | Corvidae       | <i>Cyanocorax</i>     | <i>yncas</i>          | F | San Antonio Viejo Ranch | 26.92635  | -98.88522  |
| 17937 | Passeriformes    | Cardinalidae   | <i>Passerina</i>      | <i>ciris</i>          | M | San Antonio Viejo Ranch | 26.95606  | -98.78828  |
| 17933 | Passeriformes    | Cardinalidae   | <i>Passerina</i>      | <i>ciris</i>          | M | San Antonio Viejo Ranch | 26.95606  | -98.78828  |
| 24153 | Passeriformes    | Parulidae      | <i>Leiothlypis</i>    | <i>celata</i>         | F | San Antonio Viejo Ranch | 26.95606  | -98.78828  |
| 17989 | Passeriformes    | Icteridae      | <i>Icterus</i>        | <i>cucullatus</i>     | M | San Antonio Viejo Ranch | 26.83624  | -98.79912  |
| 23475 | Passeriformes    | Tyrannidae     | <i>Tyrannus</i>       | <i>forficatus</i>     | F | El Sauz Ranch           | 26.613433 | -97.4451   |
| 23474 | Caprimulgiformes | Trochilidae    | <i>Amazilia</i>       | <i>yucatanensis</i>   | F | El Sauz Ranch           |           |            |
| 24151 | Passeriformes    | Parulidae      | <i>Leiothlypis</i>    | <i>ruficapilla</i>    | F | San Antonio Viejo Ranch | 26.95606  | -98.78828  |
| 23476 | Passeriformes    | Parulidae      | <i>Setophaga</i>      | <i>petechia</i>       | M | El Sauz Ranch           |           |            |
| 23704 | Passeriformes    | Parulidae      | <i>Parkesia</i>       | <i>noveboracensis</i> | F | El Sauz Ranch           | 26.60893  | -97.51284  |
| 22824 | Columbiformes    | Columbidae     | <i>Columbina</i>      | <i>passerina</i>      | F | San Antonio Viejo Ranch | 26.9559   | -98.78826  |
| 22825 | Columbiformes    | Columbidae     | <i>Columbina</i>      | <i>passerina</i>      | M | San Antonio Viejo Ranch | 26.75978  | -98.77691  |
| 21839 | Passeriformes    | Hirundinidae   | <i>Petrochelidon</i>  | <i>fulva</i>          | M | El Sauz Ranch           | 26.600727 | -97.502251 |
| 22823 | Falconiformes    | Falconidae     | <i>Falco</i>          | <i>sparverius</i>     | F | El Sauz Ranch           |           |            |
| 22835 | Passeriformes    | Parulidae      | <i>Leiothlypis</i>    | <i>celata</i>         | F | San Antonio Viejo Ranch | 26.95606  | -98.78828  |
| 22834 | Passeriformes    | Paridae        | <i>Baeolophus</i>     | <i>atricristatus</i>  | F | San Antonio Viejo Ranch | 26.95606  | -98.78828  |
| 22832 | Passeriformes    | Tyrannidae     | <i>Sayornis</i>       | <i>phoebe</i>         | F | San Antonio Viejo Ranch | 26.95606  | -98.78828  |
| 22831 | Passeriformes    | Poliophtilidae | <i>Poliophtila</i>    | <i>caerulea</i>       | F | San Antonio Viejo Ranch | 26.7154   | -98.77567  |
| 22826 | Cuculiformes     | Cuculidae      | <i>Geococcyx</i>      | <i>californianus</i>  | F | El Sauz Ranch           | 26.61258  | -97.47411  |
| 21844 | Falconiformes    | Falconidae     | <i>Falco</i>          | <i>sparverius</i>     | F | El Sauz Ranch           | 26.595070 | -97.465109 |
| 22754 | Caprimulgiformes | Caprimulgidae  | <i>Nyctidromus</i>    | <i>albicollis</i>     | F | San Antonio Viejo Ranch | 26.957073 | -98.835408 |
| 22755 | Caprimulgiformes | Caprimulgidae  | <i>Phalaenoptilus</i> | <i>nuttallii</i>      | M | San Antonio Viejo Ranch | 26.957073 | -98.835408 |
| 22776 | Accipitriformes  | Accipitridae   | <i>Accipiter</i>      | <i>striatus</i>       | F | El Sauz Ranch           | 26.60893  | -97.51284  |
| 22699 | Charadriiformes  | Laridae        | <i>Rynchops</i>       | <i>niger</i>          | F | El Sauz Ranch           | 29.51423  | -97.48663  |
| 22684 | Charadriiformes  | Laridae        | <i>Rynchops</i>       | <i>niger</i>          | F | El Sauz Ranch           | 29.51423  | -97.48663  |
| 22683 | Accipitriformes  | Cathartidae    | <i>Cathartes</i>      | <i>aura</i>           | F | El Sauz Ranch           | 26.612012 | -97.477411 |
| 21849 | Falconiformes    | Falconidae     | <i>Caracara</i>       | <i>cheriway</i>       | F | El Sauz Ranch           | 26.612012 | -97.477411 |
| 21847 | Charadriiformes  | Scolopacidae   | <i>Tringa</i>         | <i>melanoleuca</i>    | F | El Sauz Ranch           | 26.61218  | -97.44562  |
| 21836 | Passeriformes    | Tyrannidae     | <i>Myiarchus</i>      | <i>crinitus</i>       | U | El Sauz Ranch           | 26.59478  | -97.470952 |
| 21845 | Passeriformes    | Mimidae        | <i>Toxostoma</i>      | <i>longirostre</i>    | F | El Sauz Ranch           | 26.613015 | -97.520717 |
| 22822 | Passeriformes    | Tyrannidae     | <i>Tyrannus</i>       | <i>couchii</i>        | M | El Sauz Ranch           |           |            |
| 21843 | Passeriformes    | Corvidae       | <i>Cyanocorax</i>     | <i>yncas</i>          | F | El Sauz Ranch           | 26.613015 | -97.520717 |
| 21842 | Passeriformes    | Corvidae       | <i>Cyanocorax</i>     | <i>yncas</i>          | F | El Sauz Ranch           | 26.613015 | -97.520717 |
| 21841 | Falconiformes    | Falconidae     | <i>Caracara</i>       | <i>cheriway</i>       | U | El Sauz Ranch           | 26.612012 | -97.477411 |
| 21838 | Charadriiformes  | Scolopacidae   | <i>Calidris</i>       | <i>minutilla</i>      | U | El Sauz Ranch           | 26.605705 | -97.479315 |
| 21835 | Passeriformes    | Tyrannidae     | <i>Pyrocephalus</i>   | <i>rubinus</i>        | F | El Sauz Ranch           | 26.60893  | -97.51284  |

|       |               |              |                  |                     |   |                         |          |            |
|-------|---------------|--------------|------------------|---------------------|---|-------------------------|----------|------------|
| 21834 | Passeriformes | Hirundinidae | <i>Progne</i>    | <i>subis</i>        | F | El Sauz Ranch           | 26.59478 | -97.470952 |
| 21832 | Passeriformes | Icteridae    | <i>Icterus</i>   | <i>cucullatus</i>   | F | El Sauz Ranch           | 26.59478 | -97.470952 |
| 22828 | Columbiformes | Columbidae   | <i>Zenaida</i>   | <i>macroura</i>     | F | San Antonio Viejo Ranch | 26.80944 | -98.79747  |
| 21831 | Passeriformes | Icteridae    | <i>Icterus</i>   | <i>cucullatus</i>   | M | El Sauz Ranch           | 26.59478 | -97.470952 |
| 22821 | Passeriformes | Corvidae     | <i>Corvus</i>    | <i>cryptoleucus</i> | M | San Antonio Viejo Ranch | 26.9588  | -98.85242  |
| 21846 | Passeriformes | Icteridae    | <i>Sturnella</i> | <i>neglecta</i>     | M | El Sauz Ranch           | 26.61218 | -97.44562  |
