# Supplementary material
Source: MDPI journal article supplement (https://www.mdpi.com/1424-2818/13/9/430)

Supplementary Figure 5. Bayesian phylogeny of combined mitochondrial (COI gene) and nuclear gene (EF-1 $\alpha$ ). Posterior probabilities  $\geq 0.95$  are shown and sequences in gray are from GenBank.

## Ischnocera

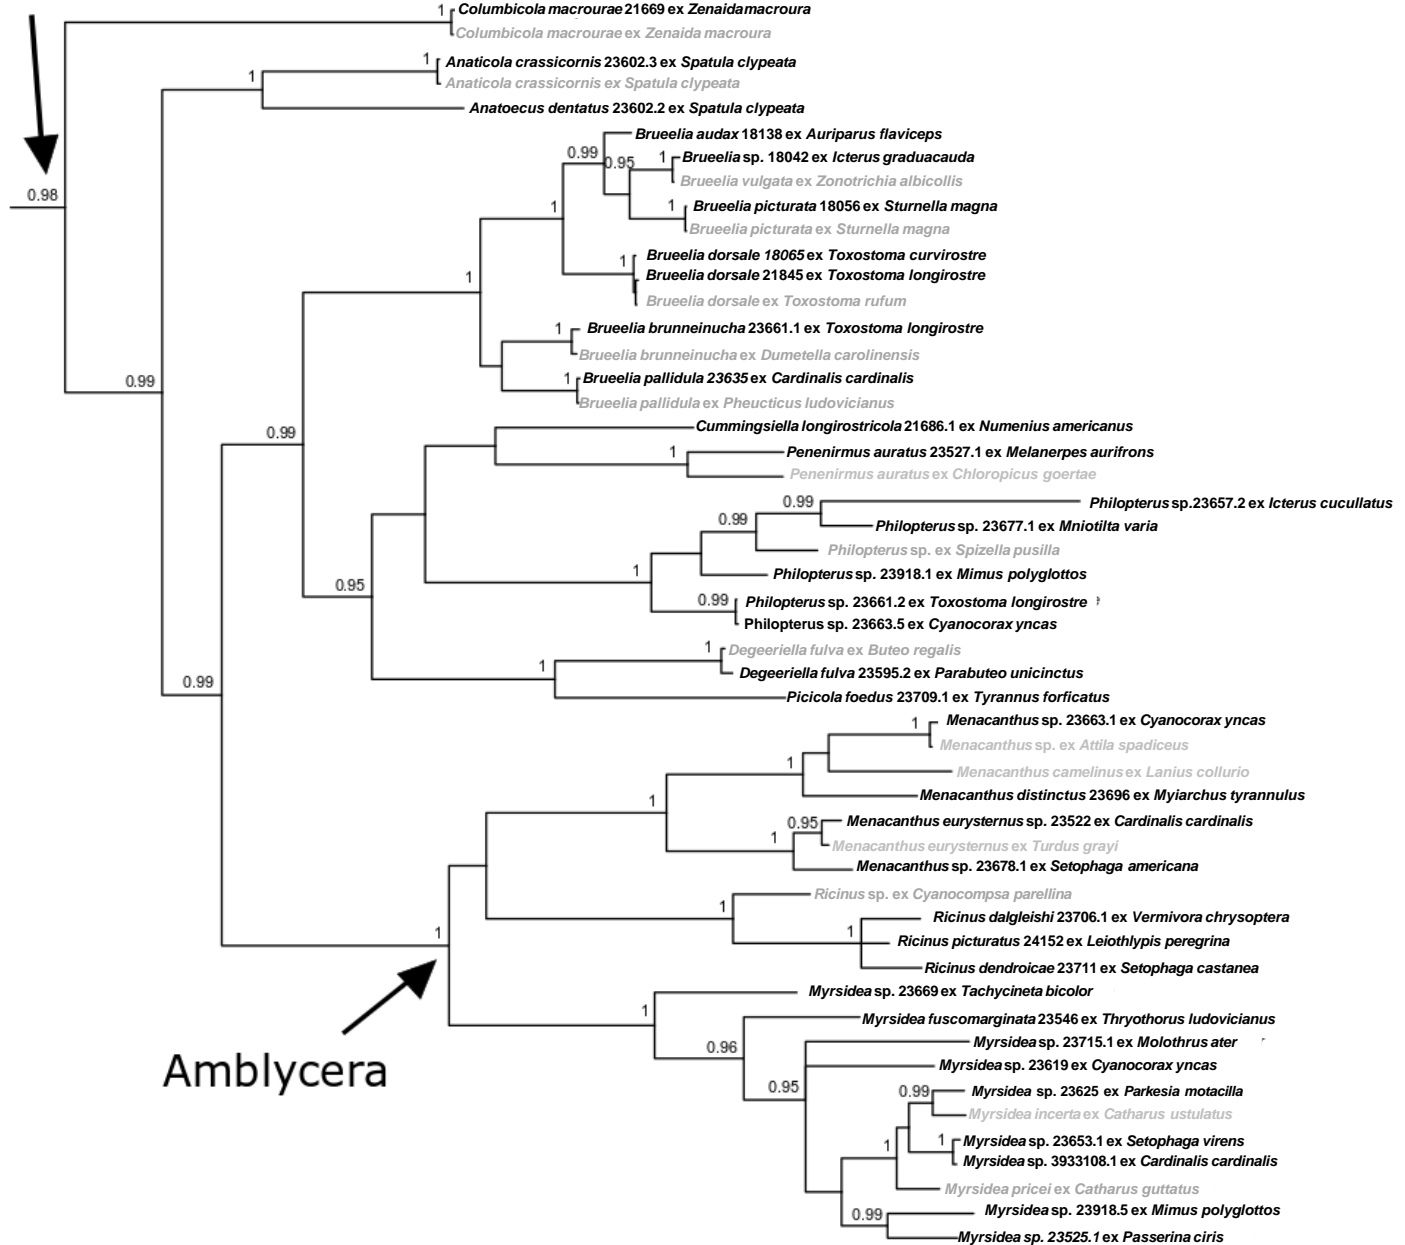

Supplement: s1 [file s1]
