# Supplementary material
Source: MDPI journal article supplement (https://www.mdpi.com/1424-2818/13/9/430)
Supplement: s1 [file s1]

Supplementary Table 2. Louse specimens used in analysis from South Texas with corresponding GenBank reference numbers for each gene. TCWC ID refers to bird voucher specimen numbers (five digits), or non-vouchers (other designations) that were ruffled and released.

| Louse species           | Host species                   | TCWC ID | COI      | 18S      | EF-1 $\alpha$ |
|-------------------------|--------------------------------|---------|----------|----------|---------------|
| <b>Amblycera</b>        |                                |         |          |          |               |
| <i>Hohorstiella</i> sp. | <i>Columbina passerina</i>     | 23941   | MZ964420 | –        | –             |
| <i>Menacanthus</i> sp.  | <i>Cyanocorax yncas</i>        | 23663   | MZ964427 | MZ964563 | MZ964517      |
| <i>Menacanthus</i> sp.  | <i>Icterus cucullatus</i>      | 23657   | MZ964428 | –        | –             |
| <i>Menacanthus</i> sp.  | <i>Myiarchus tyrannulus</i>    | 23696   | MZ964429 | –        | MZ964522      |
| <i>Menacanthus</i> sp.  | <i>Cardinalis cardinalis</i>   | 23522   | MZ964430 | MZ964564 | MZ964523      |
| <i>Menacanthus</i> sp.  | <i>Setophaga americana</i>     | 23678   | MZ964431 | MZ964565 | MZ964524      |
| <i>Menacanthus</i> sp.  | <i>Eremophila alpestris</i>    | 23510   | MZ964432 | MZ964566 | –             |
| <i>Myrsidea</i> sp.     | <i>Tachycineta bicolor</i>     | 23669   | MZ964433 | MZ964567 | MZ964525      |
| <i>Myrsidea</i> sp.     | <i>Chondestes grammacus</i>    | 23717   | MZ964437 | –        | –             |
| <i>Myrsidea</i> sp.     | <i>Agelaius phoeniceus</i>     | 23520   | MZ964438 | MZ964568 | –             |
| <i>Myrsidea</i> sp.     | <i>Thyothorus ludovicianus</i> | 23546   | MZ964439 | MZ964569 | MZ964526      |
| <i>Myrsidea</i> sp.     | <i>Agelaius phoeniceus</i>     | 23519   | MZ964434 | –        | –             |
| <i>Myrsidea</i> sp.     | <i>Molothrus ater</i>          | 23715   | MZ964435 | MZ964570 | MZ964527      |
| <i>Myrsidea</i> sp.     | <i>Cyanocorax yncas</i>        | 23619   | MZ964436 | –        | MZ964528      |
| <i>Myrsidea</i> sp.     | <i>Parkesia motacilla</i>      | 23625   | MZ964440 | MZ964571 | MZ964529      |
| <i>Myrsidea</i> sp.     | <i>Parkesia motacilla</i>      | 23652   | MZ964441 | –        | –             |
| <i>Myrsidea</i> sp.     | <i>Setophaga virens</i>        | 23653   | MZ964442 | MZ964572 | MZ964530      |
| <i>Myrsidea</i> sp.     | <i>Cardinalis cardinalis</i>   | 3933108 | MZ964443 | –        | MZ964531      |
| <i>Myrsidea</i> sp.     | <i>Cardinalis cardinalis</i>   | 3933142 | MZ964444 | –        | –             |
| <i>Myrsidea</i> sp.     | <i>Cardinalis cardinalis</i>   | 3933143 | MZ964445 | –        | –             |
| <i>Myrsidea</i> sp.     | <i>Cardinalis cardinalis</i>   | 3933105 | MZ964446 | –        | –             |
| <i>Myrsidea</i> sp.     | <i>Cardinalis cardinalis</i>   | 23557   | MZ964447 | –        | –             |
| <i>Myrsidea</i> sp.     | <i>Mimus polyglottos</i>       | 23918   | MZ964448 | MZ964573 | MZ964532      |
| <i>Myrsidea</i> sp.     | <i>Mimus polyglottos</i>       | 23647   | MZ964449 | MZ964574 | –             |
| <i>Myrsidea</i> sp.     | <i>Mimus polyglottos</i>       | 3933126 | MZ964450 | –        | –             |

|                        |                                        |         |          |          |          |
|------------------------|----------------------------------------|---------|----------|----------|----------|
| <i>Myrsidea</i> sp.    | <i>Mimus polyglottos</i>               | 3933033 | MZ964451 | —        | —        |
| <i>Myrsidea</i> sp.    | <i>Passerina ciris</i>                 | 23525   | MZ964453 | —        | MZ964533 |
| <i>Myrsidea</i> sp.    | <i>Piranga rubra</i>                   | 23705   | MZ964454 | —        | —        |
| <i>Ricinus</i> sp.     | <i>Passerina versicolor</i>            | 18139   | MZ964421 | —        | —        |
| <i>Ricinus</i> sp.     | <i>Pyrocephalus rubinus</i>            | 17954   | MZ964422 | MZ964575 | —        |
| <i>Ricinus</i> sp.     | <i>Vermivora chrysoptera</i>           | 23706   | MZ964423 | MZ964576 | MZ964534 |
| <i>Ricinus</i> sp.     | <i>Leiothlypis peregrina</i>           | 24152   | MZ964424 | MZ964577 | MZ964535 |
| <i>Ricinus</i> sp.     | <i>Parkesia noveboracensis</i>         | 23704   | MZ964425 | —        | —        |
| <i>Ricinus</i> sp.     | <i>Setophaga castanea</i>              | 23711   | MZ964426 | MZ964578 | MZ964536 |
| <b>Ischnocera</b>      |                                        |         |          |          |          |
| <i>Columbicola</i> sp. | <i>Columbina passerina</i>             | 23941   | MZ964459 | —        | —        |
| <i>Columbicola</i> sp. | <i>Zenaida macroura</i>                | 21669   | MZ964460 | MZ964540 | MZ964504 |
| <i>Anaticola</i> sp.   | <i>Anas clypeata</i>                   | 23602   | MZ964462 | MZ964542 | MZ964506 |
| <i>Anatoecus</i> sp.   | <i>Anas clypeata</i>                   | 23602   | MZ964464 | —        | MZ964507 |
| <i>Brueelia</i> sp.    | <i>Molothrus aeneus</i>                | 18099   | MZ964473 | —        | —        |
| <i>Brueelia</i> sp.    | <i>Agelaius phoeniceus</i>             | RWBB3   | MZ964474 | MZ964547 | —        |
| <i>Brueelia</i> sp.    | <i>Molothrus aeneus</i>                | 23919   | MZ964475 | —        | —        |
| <i>Brueelia</i> sp.    | <i>Molothrus ater</i>                  | 21687   | MZ964476 | —        | —        |
| <i>Brueelia</i> sp.    | <i>Auriparus flaviceps</i>             | 18138   | MZ964477 | —        | MZ964510 |
| <i>Brueelia</i> sp.    | <i>Toxostoma longirostre</i>           | 18186   | MZ964478 | MZ964548 | —        |
| <i>Brueelia</i> sp.    | <i>Melospiza lincolni</i>              | 23634   | MZ964484 | MZ964549 | —        |
| <i>Brueelia</i> sp.    | <i>Icterus graduacauda</i>             | 18042   | MZ964485 | MZ964550 | MZ964511 |
| <i>Brueelia</i> sp.    | <i>Sturnella magna</i>                 | 18056   | MZ964486 | MZ964551 | MZ964512 |
| <i>Brueelia</i> sp.    | <i>Toxostoma curvirostre</i>           | 18065   | MZ964479 | MZ964552 | MZ964513 |
| <i>Brueelia</i> sp.    | <i>Toxostoma longirostre</i>           | 21845   | MZ964480 | MZ964553 | MZ964514 |
| <i>Brueelia</i> sp.    | <i>Vireo griseus</i>                   | 23504   | MZ964481 | —        | —        |
| <i>Brueelia</i> sp.    | <i>Toxostoma curvirostre</i>           | 17732   | MZ964482 | —        | —        |
| <i>Brueelia</i> sp.    | <i>Campylorhynchus brunneicapillus</i> | 18041   | Pending  | —        | —        |
| <i>Brueelia</i> sp.    | <i>Mimus polyglottos</i>               | 23698   | MZ964483 | —        | —        |
| <i>Brueelia</i> sp.    | <i>Mimus polyglottos</i>               | 23918   | MZ964490 | MZ964556 | —        |

|                          |                                 |         |          |          |          |
|--------------------------|---------------------------------|---------|----------|----------|----------|
| <i>Brueelia</i> sp.      | <i>Mimus polyglottos</i>        | 3933130 | MZ964468 | —        | —        |
| <i>Brueelia</i> sp.      | <i>Toxostoma longirostre</i>    | 23661   | MZ964470 | MZ964546 | MZ964516 |
| <i>Brueelia</i> sp.      | <i>Mimus polyglottos</i>        | 3933126 | MZ964471 | —        | —        |
| <i>Brueelia</i> sp.      | <i>Mimus polyglottos</i>        | 17990   | MZ964472 | —        | —        |
| <i>Brueelia</i> sp.      | <i>Cardinalis cardinalis</i>    | 23635   | MZ964442 | MZ964544 | MZ964508 |
| <i>Goinodes</i> sp.      | <i>Colinus virginianus</i>      | 23609   | MZ964488 | MZ964555 | —        |
| <i>Cuculoecus</i> sp.    | <i>Coccyzus americanus</i>      | 18187   | MZ964463 | MZ964543 | —        |
| <i>Penenirmus</i> sp.    | <i>Melanerpes aurifrons</i>     | 23527   | MZ964461 | MZ964541 | MZ964505 |
| <i>Lunaceps</i> sp.      | <i>Calidris alba</i>            | 23614   | MZ964487 | MZ964554 | —        |
| <i>Cummingsiella</i> sp. | <i>Numenius americanus</i>      | 21686   | MZ964458 | MZ964539 | MZ964503 |
| <i>Philopterus</i> sp.   | <i>Peucaea cassinii</i>         | 23574   | MZ964489 | —        | —        |
| <i>Philopterus</i> sp.   | <i>Agelaius phoeniceus</i>      | RWBB1   | MZ964493 | MZ964558 | —        |
| <i>Philopterus</i> sp.   | <i>Spinus psaltria</i>          | 23710   | MZ964494 | —        | —        |
| <i>Philopterus</i> sp.   | <i>Toxostoma longirostre</i>    | 18070   | MZ964495 | —        | —        |
| <i>Philopterus</i> sp.   | <i>Geranoaetus albicaudatus</i> | 23596   | MZ964496 | —        | —        |
| <i>Philopterus</i> sp.   | <i>Passerina ciris</i>          | 23525   | MZ964497 | MZ964559 | —        |
| <i>Philopterus</i> sp.   | <i>Piranga rubra</i>            | 23643   | MZ964498 | MZ964560 | —        |
| <i>Philopterus</i> sp.   | <i>Icterus cucullatus</i>       | 23657   | MZ964499 | MZ964561 | MZ964519 |
| <i>Philopterus</i> sp.   | <i>Mniotilta varia</i>          | 23677   | MZ964500 | MZ964562 | MZ964520 |
| <i>Philopterus</i> sp.   | <i>Mimus polyglottos</i>        | 23918   | MZ964469 | MZ964545 | MZ964515 |
| <i>Philopterus</i> sp.   | <i>Toxostoma longirostre</i>    | 23661   | MZ964470 | MZ964546 | MZ964516 |
| <i>Philopterus</i> sp.   | <i>Cyanocorax yncas</i>         | 23663   | MZ964427 | MZ964563 | MZ964517 |
| <i>Picicola</i> sp.      | <i>Melanerpes aurifrons</i>     | 23527   | MZ964455 | —        | —        |
| <i>Picicola</i> sp.      | <i>Tyrannus forficatus</i>      | 23709   | MZ964456 | MZ964538 | MZ964502 |
| <i>Degeeriella</i> sp.   | <i>Parabuteo unicinctus</i>     | 23595   | MZ964457 | MZ964537 | MZ964501 |

---
