# Supplementary material
Source: MDPI journal article supplement (https://www.mdpi.com/1424-2818/13/9/430)

Supplementary Figure 1. Bayesian phylogeny of nuclear gene (18S) from specimens collected from South Texas. Posterior probabilities  $\geq 0.95$  are shown and sequences in gray are from GenBank; two outgroup taxa (*Anoplura*) from GenBank were pruned from the tree.

## Ischnocera

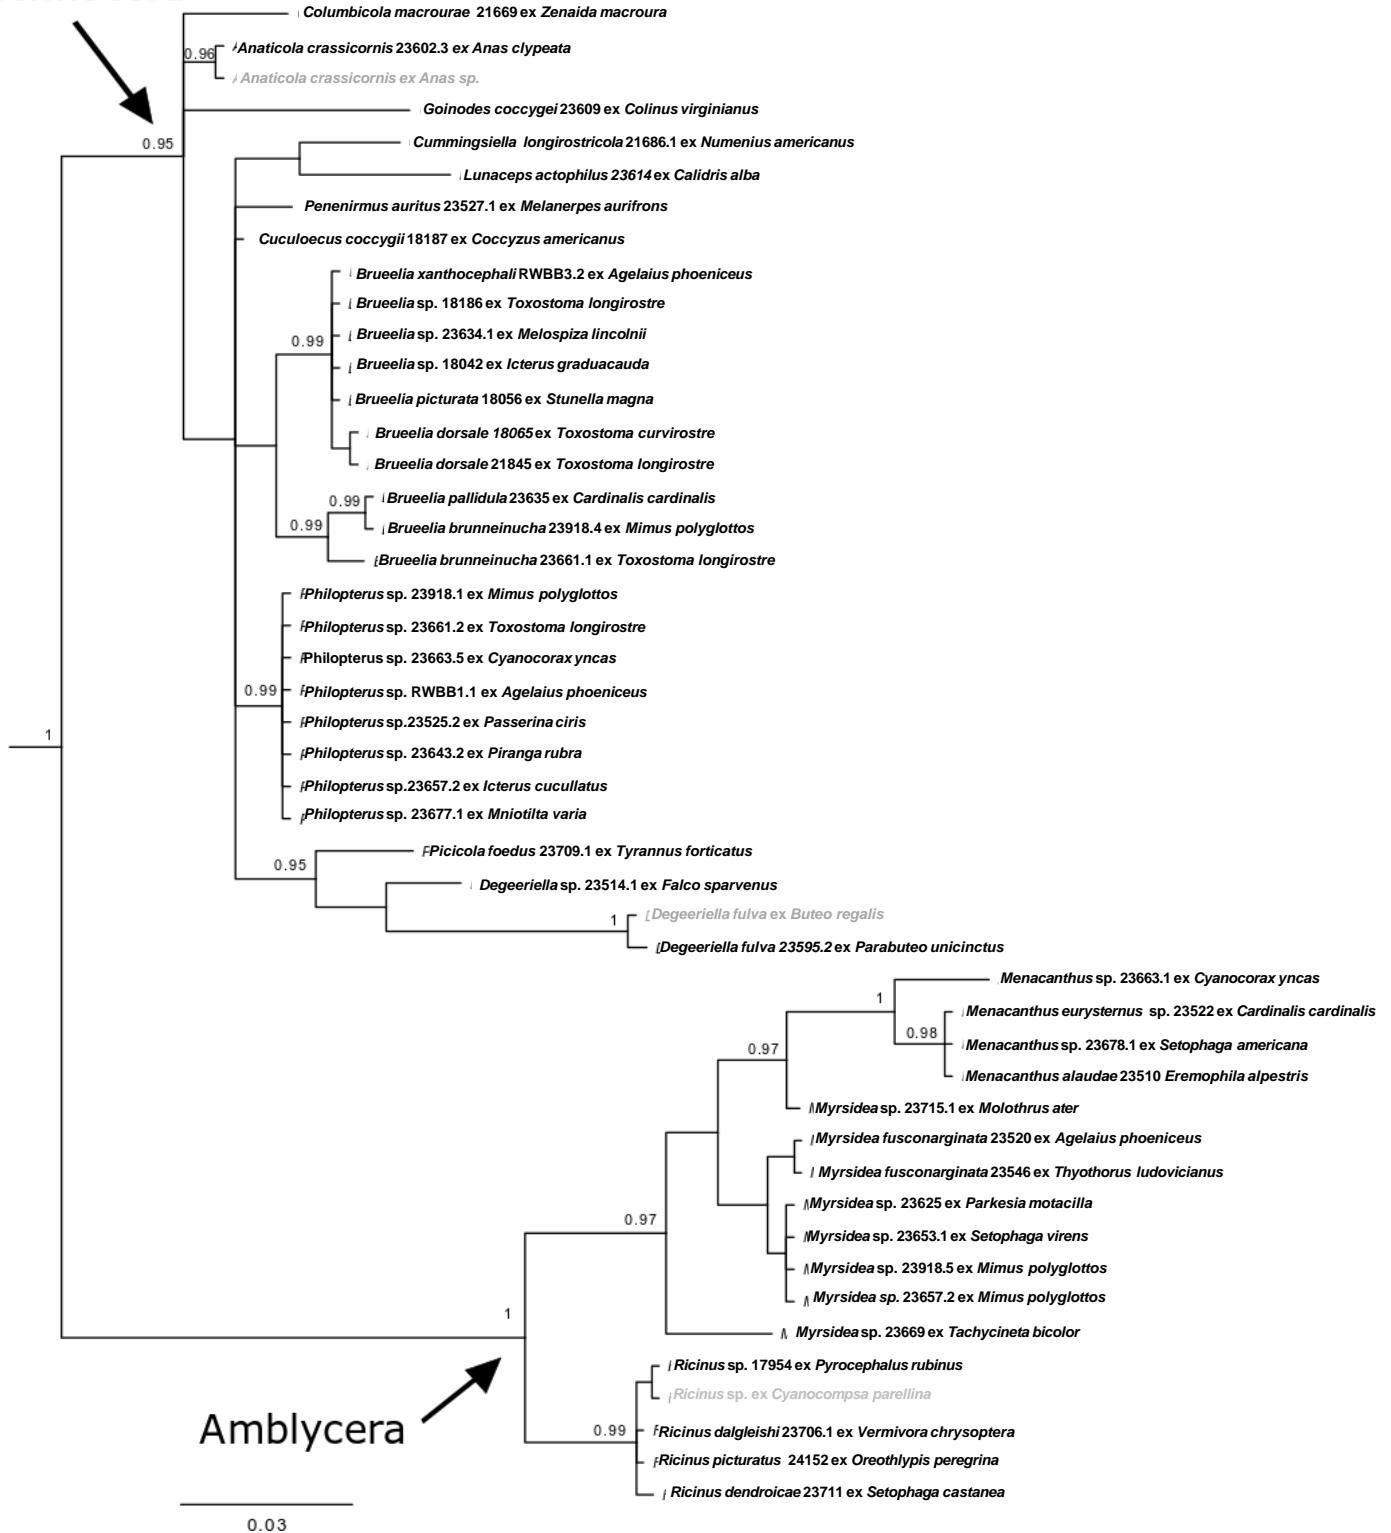

Supplement: s1 [file s1]
