# Supplementary material
Source: MDPI journal article supplement (https://www.mdpi.com/1424-2818/13/9/430)

Supplementary Figure 2. Bayesian phylogeny of nuclear gene (EF-1 $\alpha$ ) from taxa collected from South Texas. Posterior probabilities  $\geq 0.95$  are shown and sequences in gray are from GenBank. Two outgroup taxa (*Anoplura*) from GenBank were pruned from the tree.

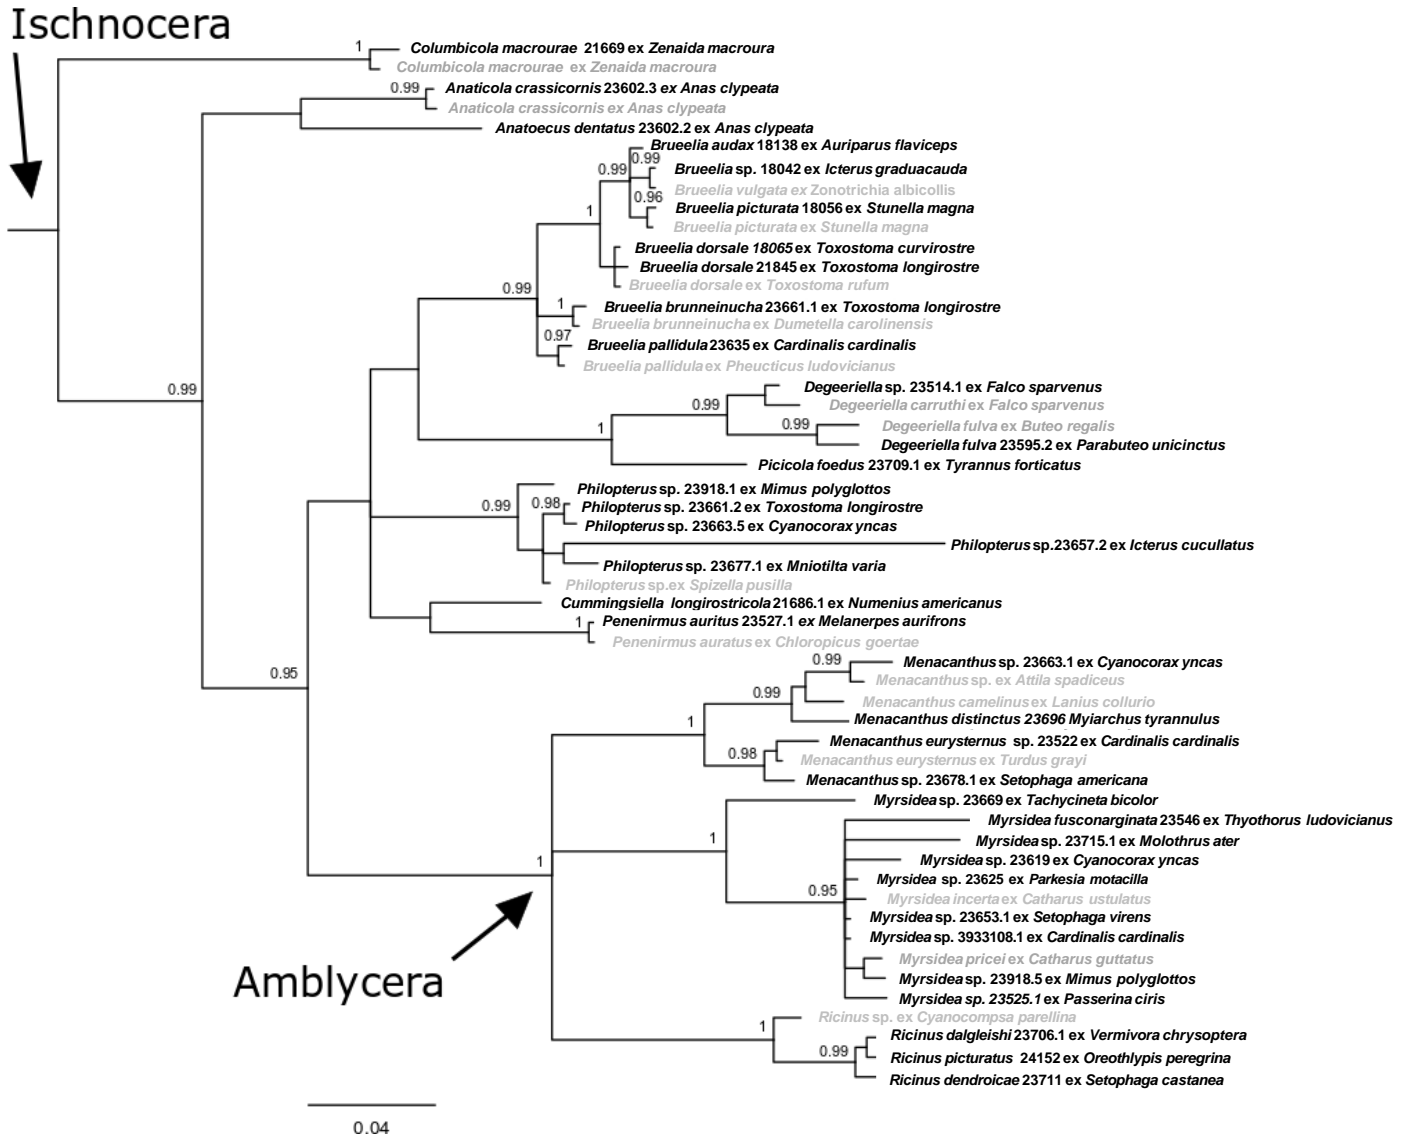

Supplement: s1 [file s1]
